# Supplementary material for: Cytotoxic and Antibacterial Meroterpenoids Isolated from the Marine-Derived Fungus Talaromyces sp. M27416
Source: MDPI journal article supplement (doi:10.3390/md22040186), 2024-04-20
Supplement: s1 [file s1]

# Cytotoxic and Antibacterial Meroterpenoids Isolated from the Marine-Derived Fungus *Talaromyces* sp. M27416

Lingzhi Tang <sup>1, #</sup>, Jinmei Xia <sup>2, #</sup>, Zhongwei Chen <sup>1</sup>, Fengjiao Lin <sup>1</sup>, Zongze Shao <sup>2</sup>, Weiyi Wang <sup>2, \*</sup>, Xuan Hong <sup>1, \*</sup>

## Table of Contents

|                                                                                                                            |    |
|----------------------------------------------------------------------------------------------------------------------------|----|
| Figure S1. MS spectrum of 1 .....                                                                                          | 3  |
| Figure S2. <sup>1</sup> H NMR spectrum of 1 .....                                                                          | 3  |
| Figure S3. <sup>13</sup> C NMR spectrum of 1 .....                                                                         | 4  |
| Figure S4. DEPT spectrum of 1 .....                                                                                        | 5  |
| Figure S5. HSQC spectrum of 1 .....                                                                                        | 6  |
| Figure S6. HMBC spectrum of 1 .....                                                                                        | 7  |
| Figure S7. COSY spectrum of 1 .....                                                                                        | 8  |
| Figure S8. NOESY spectrum of 1 .....                                                                                       | 9  |
| Figure S9. MS spectrum of 2 .....                                                                                          | 9  |
| Figure S10. <sup>1</sup> H NMR spectrum of 2 .....                                                                         | 10 |
| Figure S11. <sup>13</sup> C NMR spectrum of 2 .....                                                                        | 11 |
| Figure S12. DEPT spectrum of 2 .....                                                                                       | 12 |
| Figure S13. HSQC spectrum of 2 .....                                                                                       | 13 |
| Figure S14. HMBC spectrum of 2 .....                                                                                       | 14 |
| Figure S15. COSY spectrum of 2 .....                                                                                       | 15 |
| Figure S16. NOESY spectrum of 2 .....                                                                                      | 16 |
| Figure S17. MS spectrum of 3 .....                                                                                         | 16 |
| Figure S18. <sup>1</sup> H NMR spectrum of 3 .....                                                                         | 17 |
| Figure S19. <sup>13</sup> C NMR spectrum of 3 .....                                                                        | 18 |
| Figure S20. DEPT spectrum of 3 .....                                                                                       | 19 |
| Figure S21. HSQC spectrum of 3 .....                                                                                       | 20 |
| Figure S22. HMBC spectrum of 3 .....                                                                                       | 21 |
| Figure S23. COSY spectrum of 3 .....                                                                                       | 22 |
| Figure S24. NOESY spectrum of 3 .....                                                                                      | 23 |
| Table S1. Experimental and calculated <sup>13</sup> C-NMR chemical shifts of 8'R-1 .....                                   | 24 |
| Table S2. Experimental and calculated <sup>1</sup> H-NMR chemical shifts of 8'R-1 .....                                    | 24 |
| Table S3. Conformational analysis of the B3LYP/6-31G(d) optimized conformers of 8'R-1 in the gas phase (T=298.15 K) .....  | 25 |
| Table S4. Atomic coordinates (Å) of 8'R-1-1 obtained at the B3LYP/6-31G(d) level of theory in the gas phase. ....          | 25 |
| Table S5. Atomic coordinates (Å) of 8'R-1-2 obtained at the B3LYP/6-31G(d) level of theory in the gas phase. ....          | 26 |
| Table S6. Atomic coordinates (Å) of 8'R-1-3 obtained at the B3LYP/6-31G(d) level of theory in the gas phase. ....          | 26 |
| Table S7. Atomic coordinates (Å) of 8'R-1-4 obtained at the B3LYP/6-31G(d) level of theory in the gas phase. ....          | 27 |
| Table S8. Experimental and calculated <sup>13</sup> C-NMR chemical shifts of 8'S-1 .....                                   | 28 |
| Table S9. Experimental and calculated <sup>1</sup> H-NMR chemical shifts of 8'S-1 .....                                    | 28 |
| Table S10. Conformational analysis of the B3LYP/6-31G(d) optimized conformers of 8'S-1 in the gas phase (T=298.15 K) ..... | 29 |
| Table S11. Atomic coordinates (Å) of 8'S-1-1 obtained at the B3LYP/6-31G(d) level of theory in the gas phase. ....         | 29 |
| Table S12. Atomic coordinates (Å) of 8'S-1-2 obtained at the B3LYP/6-31G(d) level of theory in the gas phase. ....         | 30 |
| Table S13. Atomic coordinates (Å) of 8'S-1-3 obtained at the B3LYP/6-31G(d) level of theory in the gas phase. ....         | 30 |

|                                                                                                                                                                                                      |    |
|------------------------------------------------------------------------------------------------------------------------------------------------------------------------------------------------------|----|
| Figure S25. Result of DP4+ analysis (Isomer 1: 8'R-1; Isomer 2: 8'S-1) .....                                                                                                                         | 31 |
| Table S14. Key transitions, oscillator strengths, and rotatory strengths in the ECD spectrum of conformer 8'R-1-1 at the CAM-B3LYP/6-311G(d) level of theory in MeOH with IEFPCM solvent model. .... | 31 |
| Table S15. Key transitions, oscillator strengths, and rotatory strengths in the ECD spectrum of conformer 8'R-1-2 at the CAM-B3LYP/6-311G(d) level of theory in MeOH with IEFPCM solvent model. .... | 33 |
| Table S16. Key transitions, oscillator strengths, and rotatory strengths in the ECD spectrum of conformer 8'R-1-3 at the CAM-B3LYP/6-311G(d) level of theory in MeOH with IEFPCM solvent model. .... | 35 |
| Table S17. Key transitions, oscillator strengths, and rotatory strengths in the ECD spectrum of conformer 8'R-1-4 at the CAM-B3LYP/6-311G(d) level of theory in MeOH with IEFPCM solvent model. .... | 37 |

T3-23 76 (0.311) Cm (73:77)

1: TOF MS ES+  
8.14e5

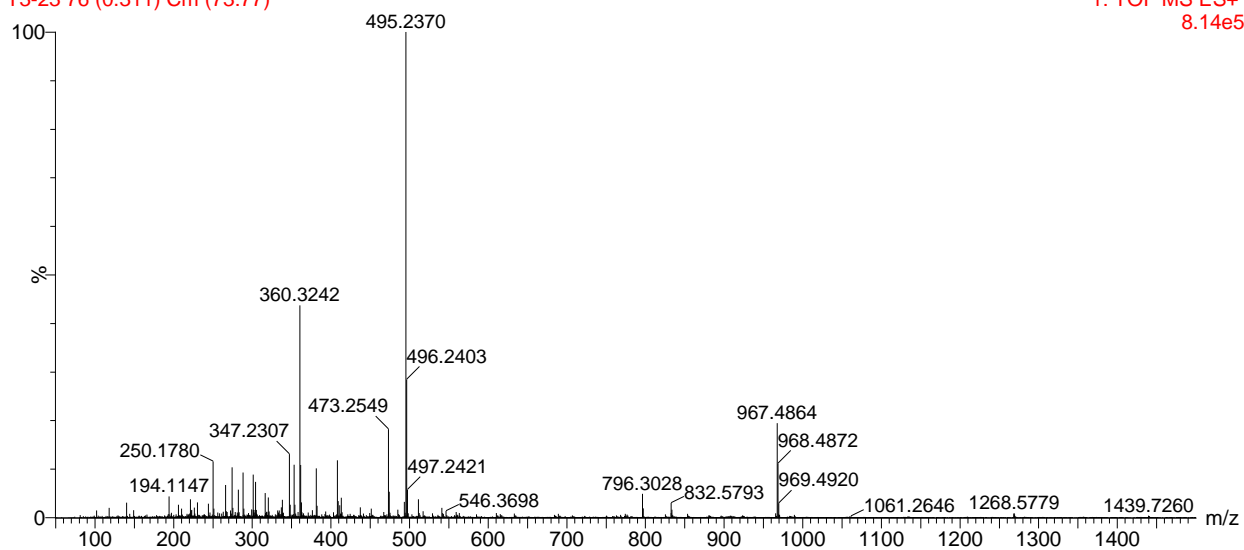

Figure S1. MS spectrum of **1**

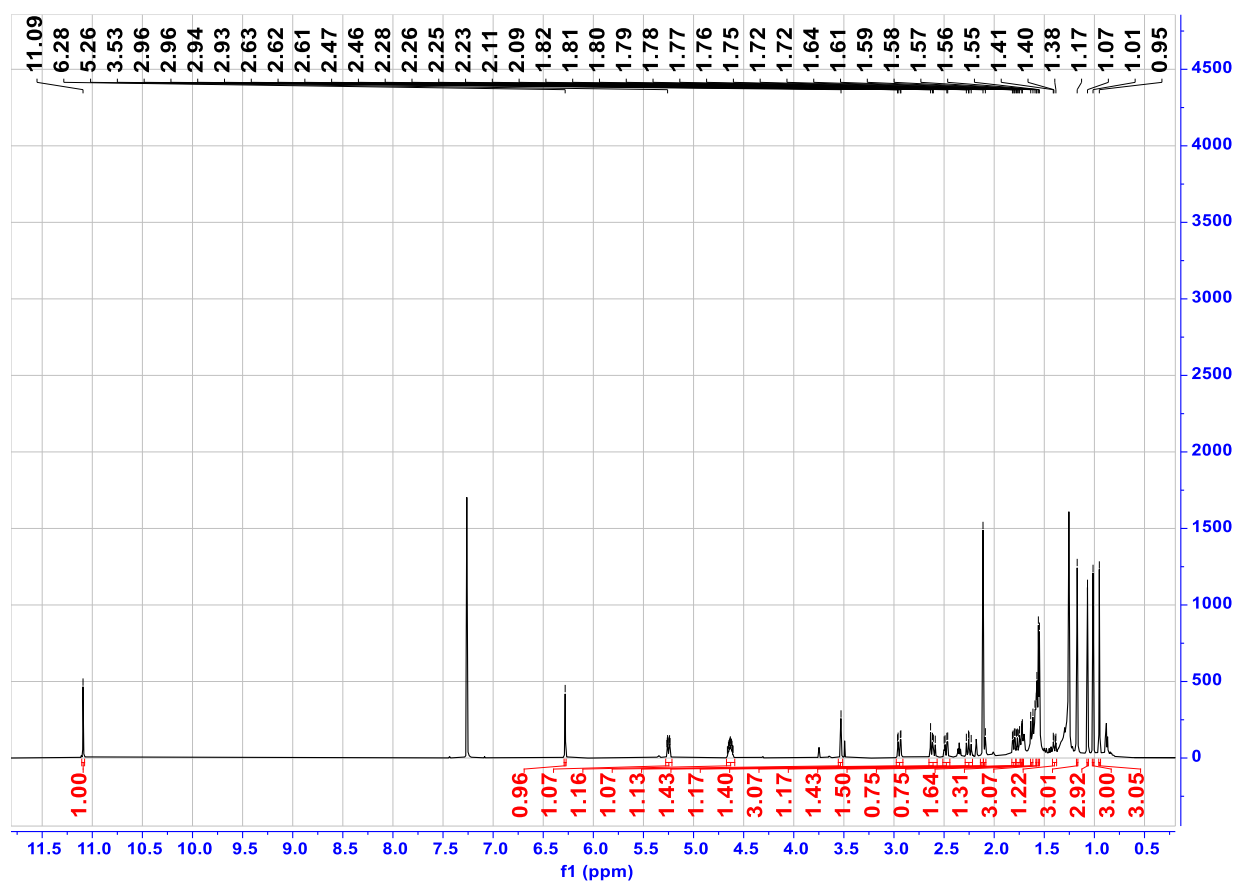

Figure S2. <sup>1</sup>H NMR spectrum of **1**

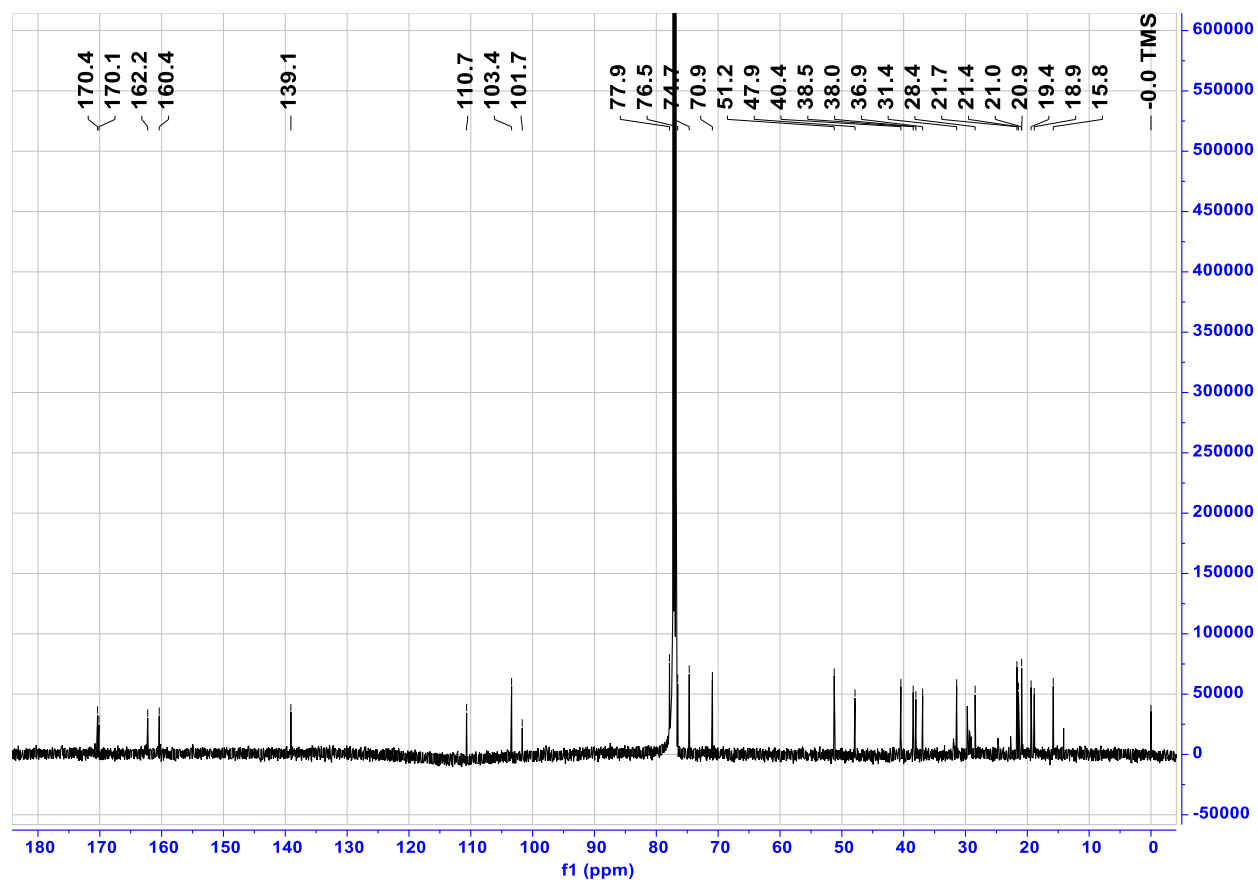

Figure S3.  $^{13}\text{C}$  NMR spectrum of **1**

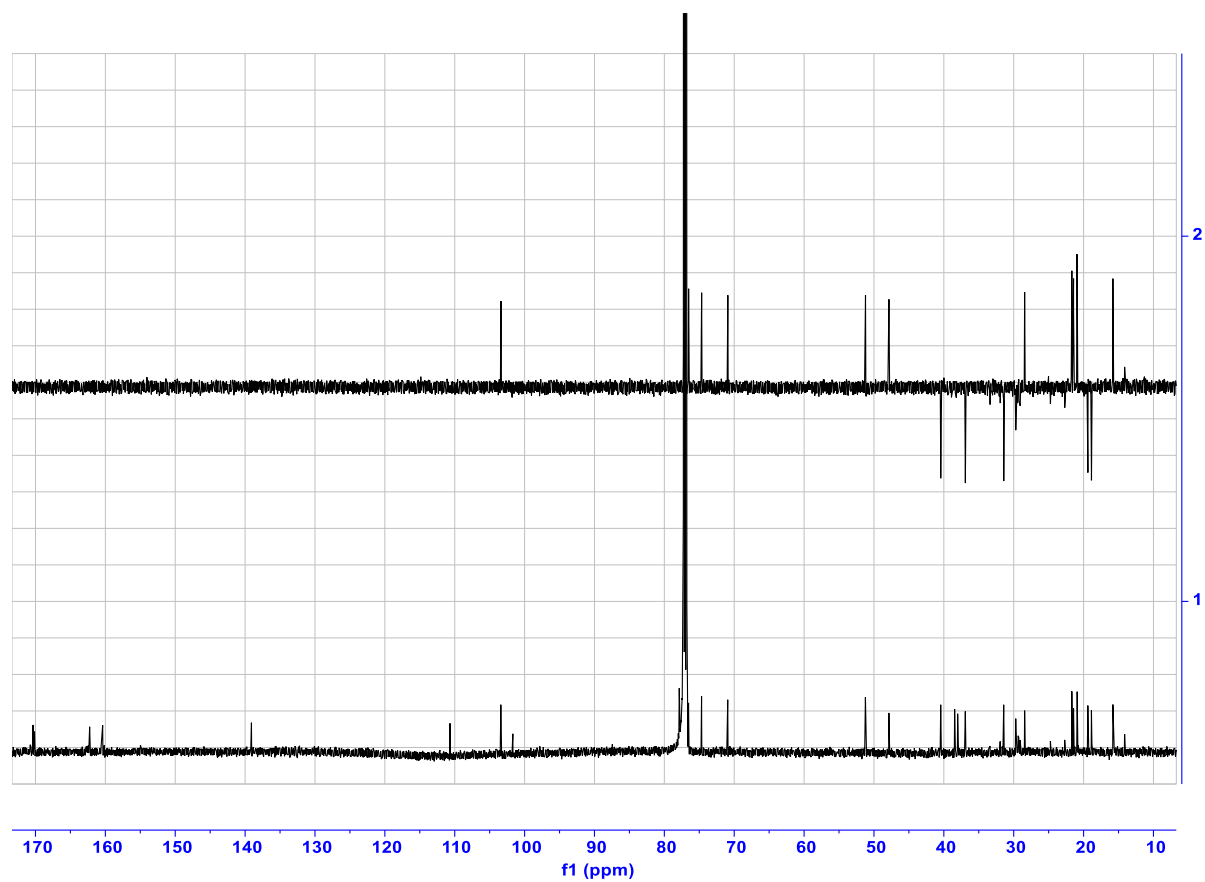

Figure S4. DEPT spectrum of 1

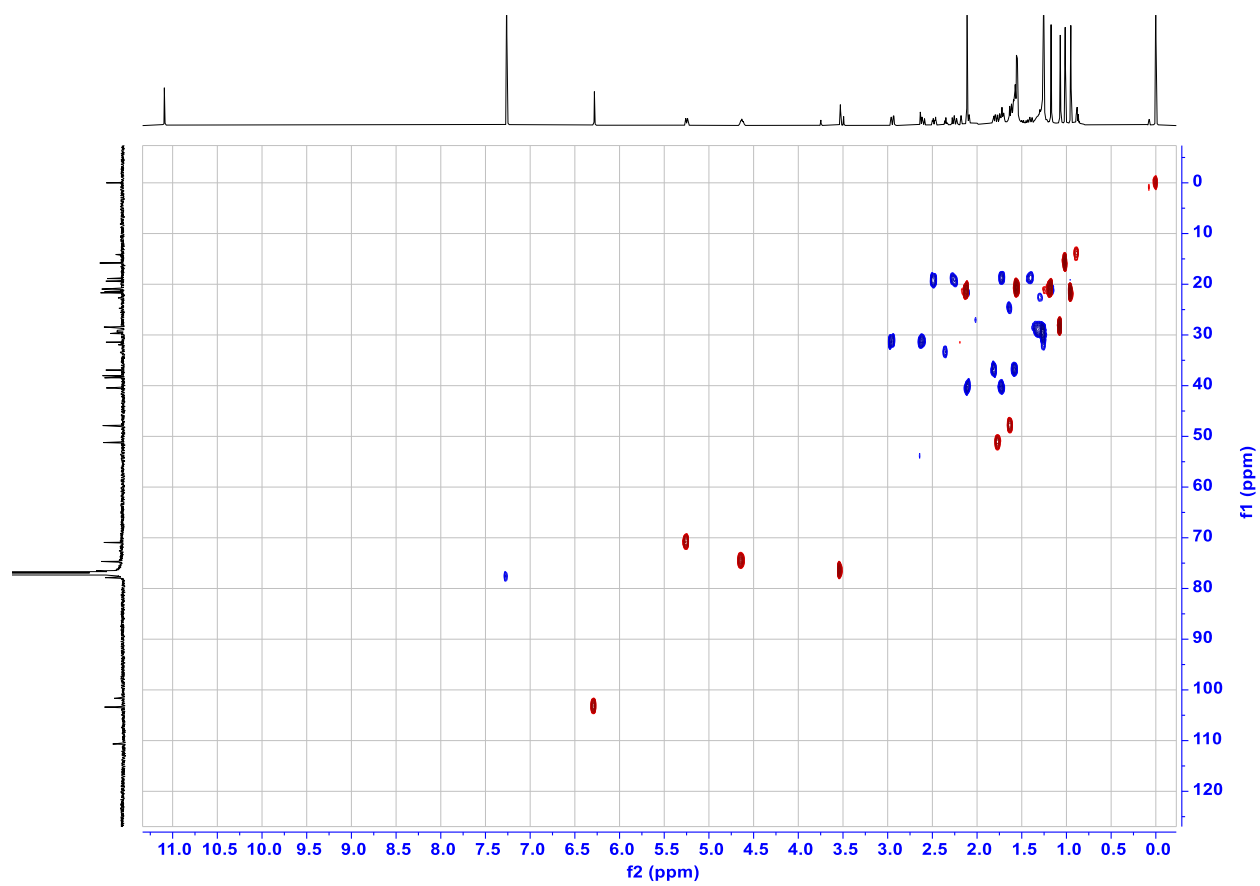

**Figure S5.** HSQC spectrum of **1**

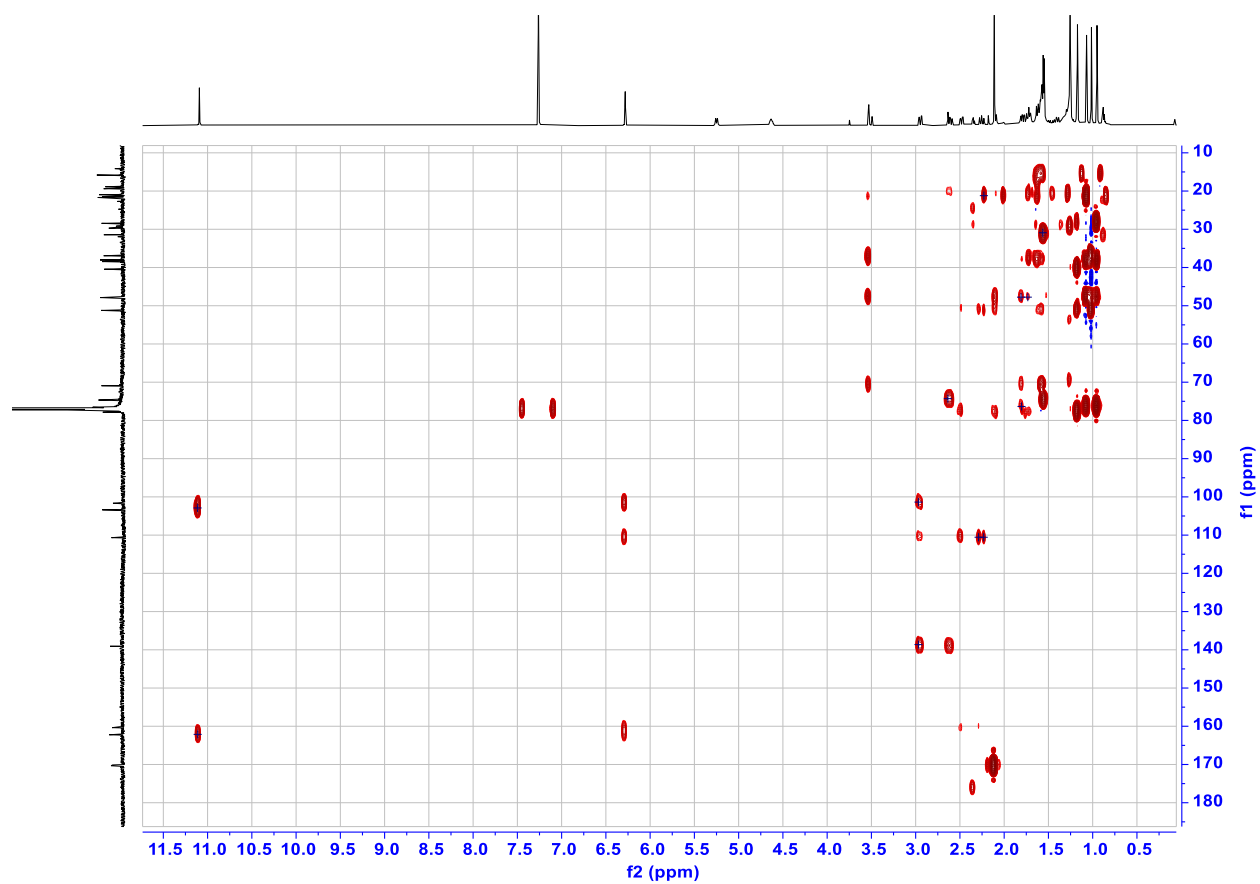

Figure S6. HMBC spectrum of 1

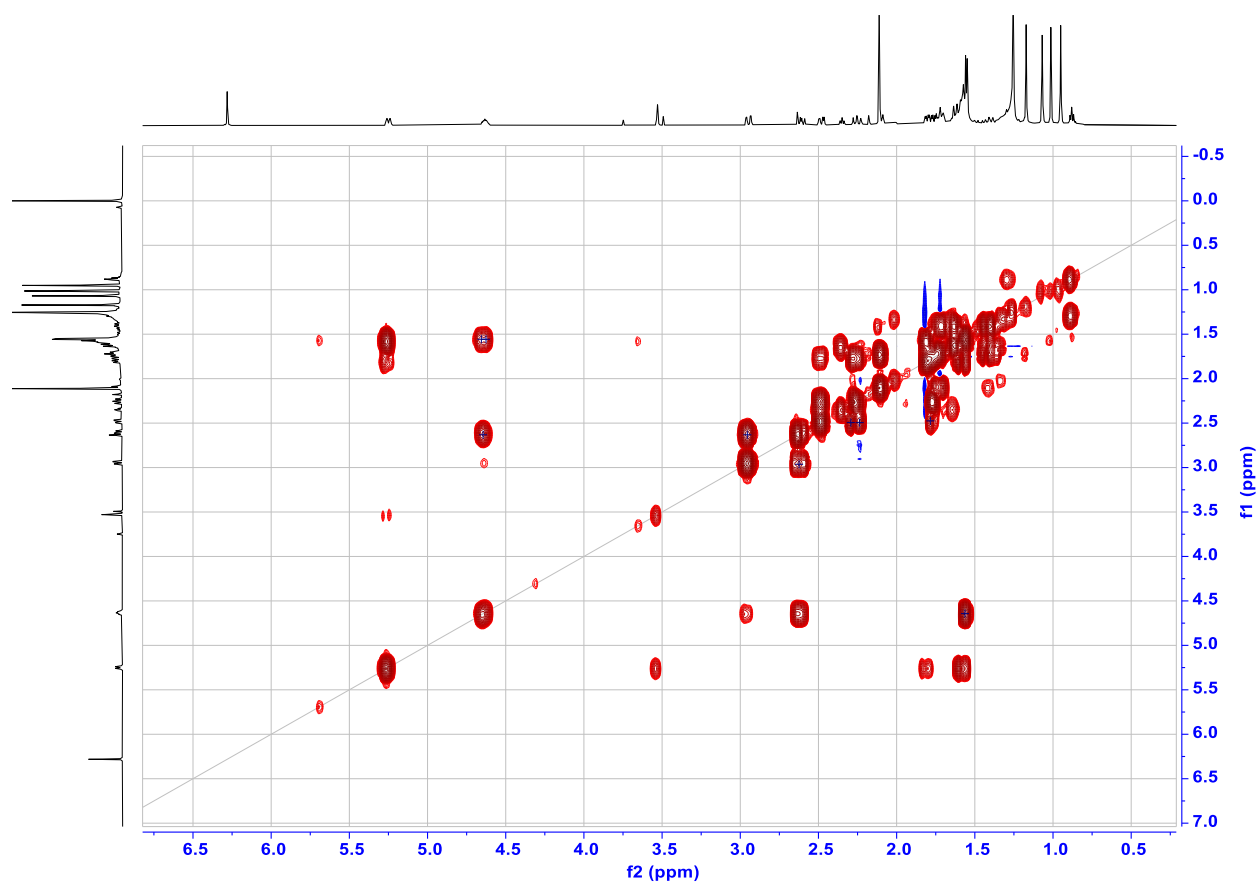

**Figure S7.** COSY spectrum of **1**



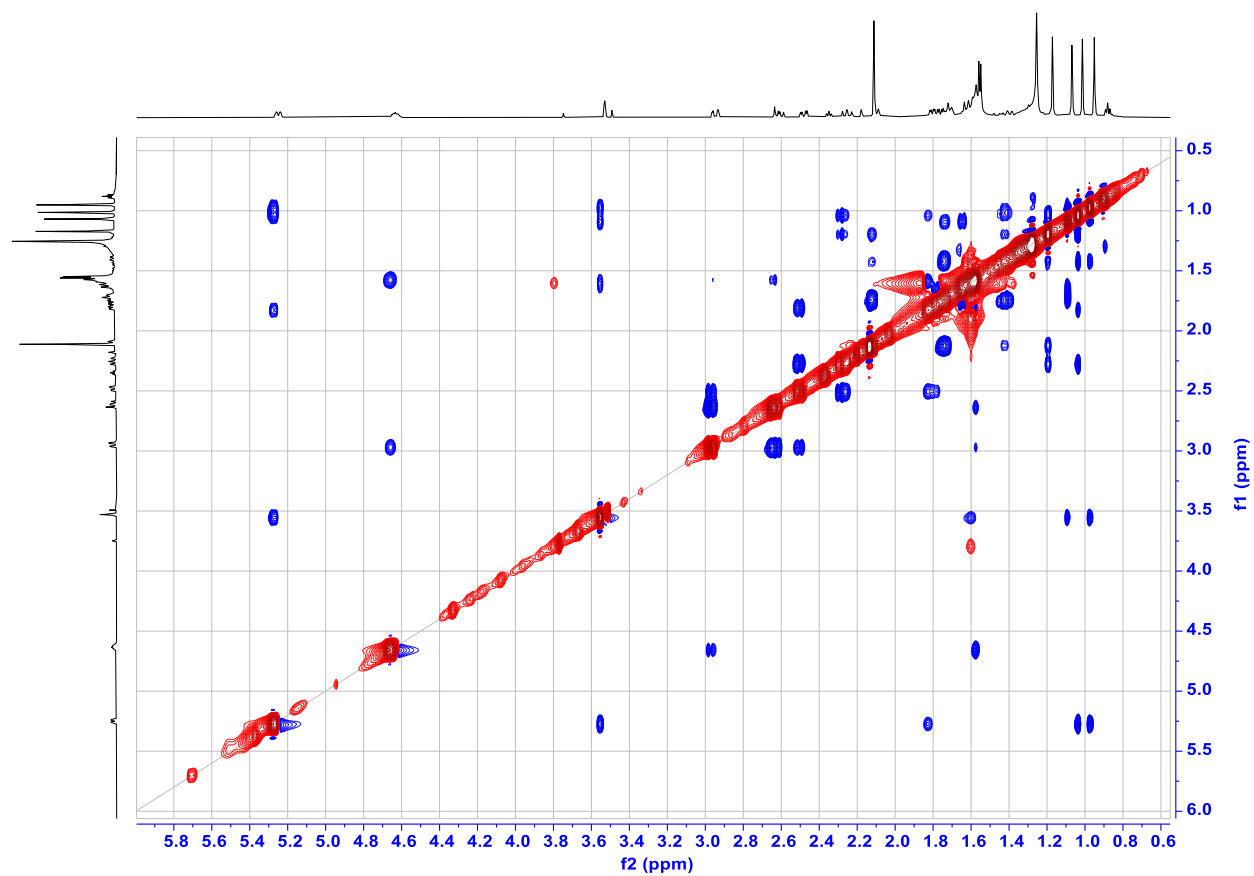

**Figure S8.** NOESY spectrum of **1**

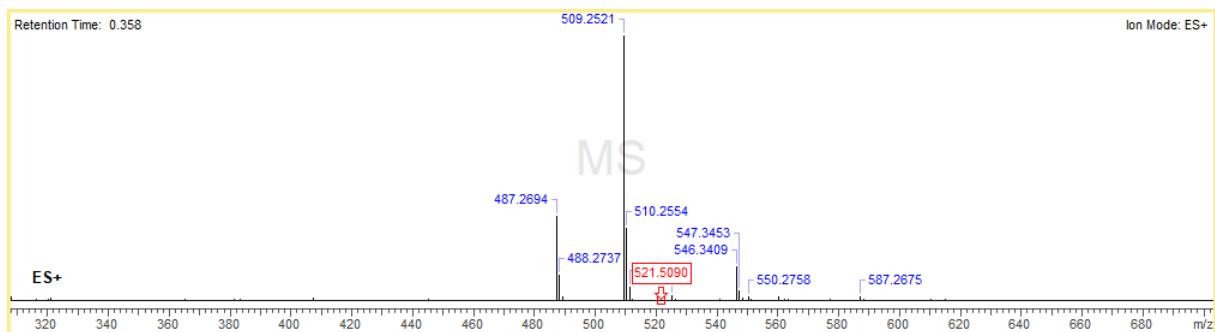

**Figure S9.** MS spectrum of **2**

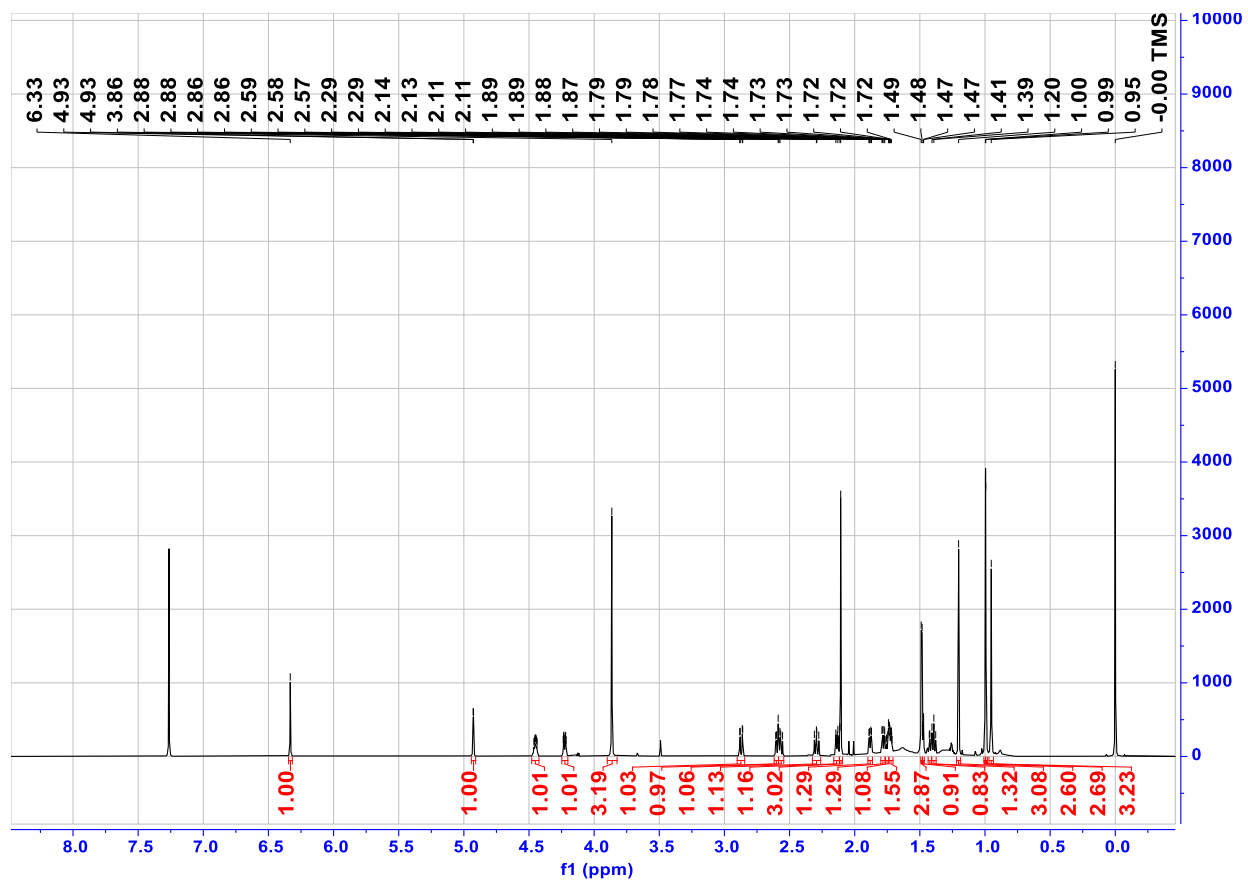

**Figure S10.**  $^1\text{H}$  NMR spectrum of **2**

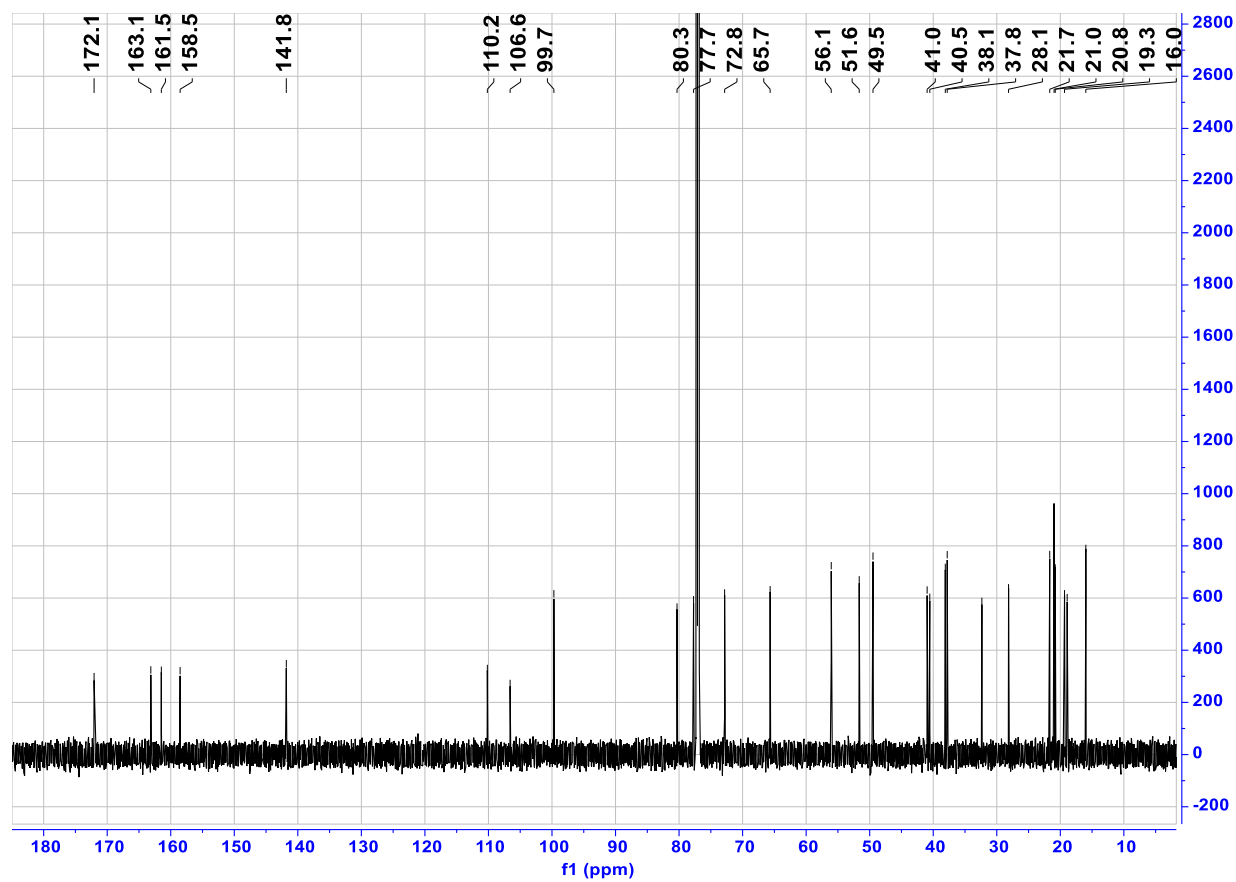

**Figure S11.** <sup>13</sup>C NMR spectrum of **2**

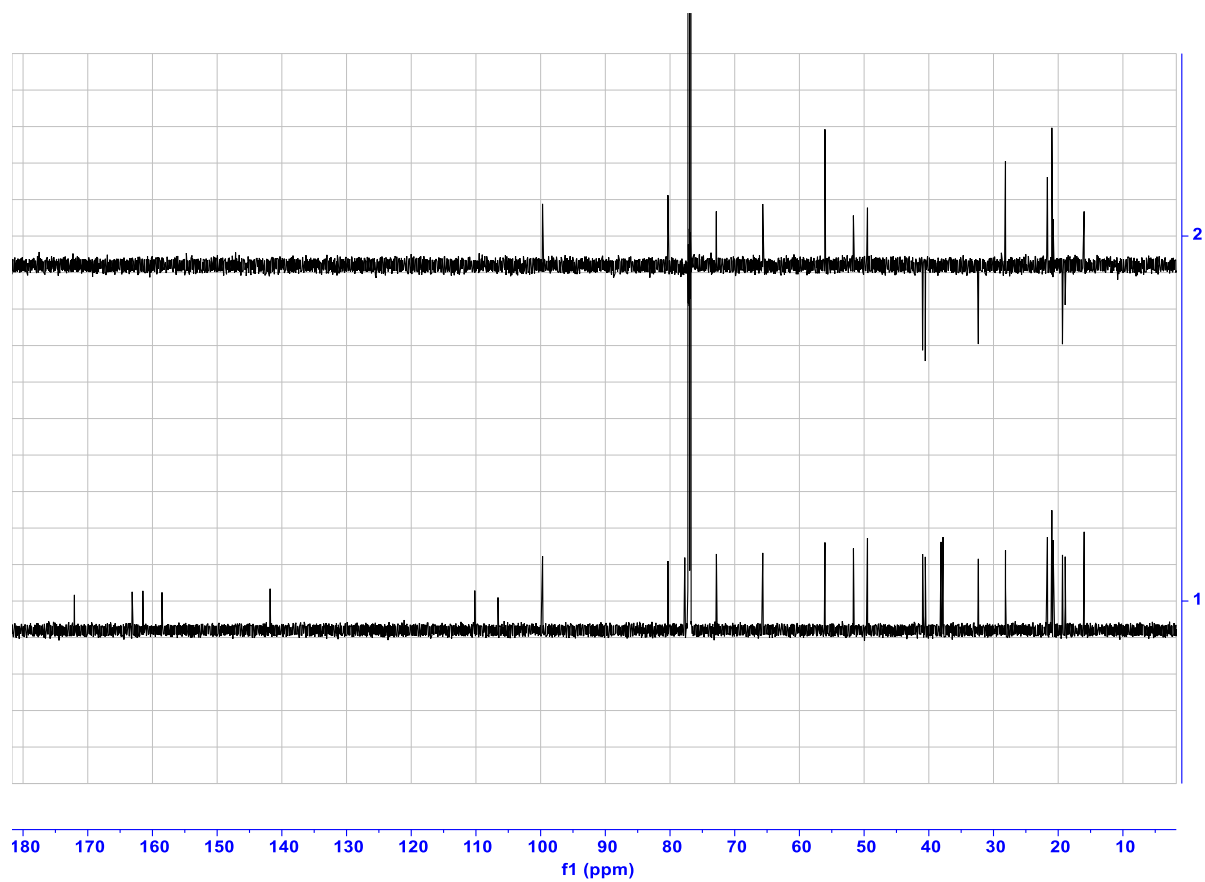

**Figure S12.** DEPT spectrum of **2**

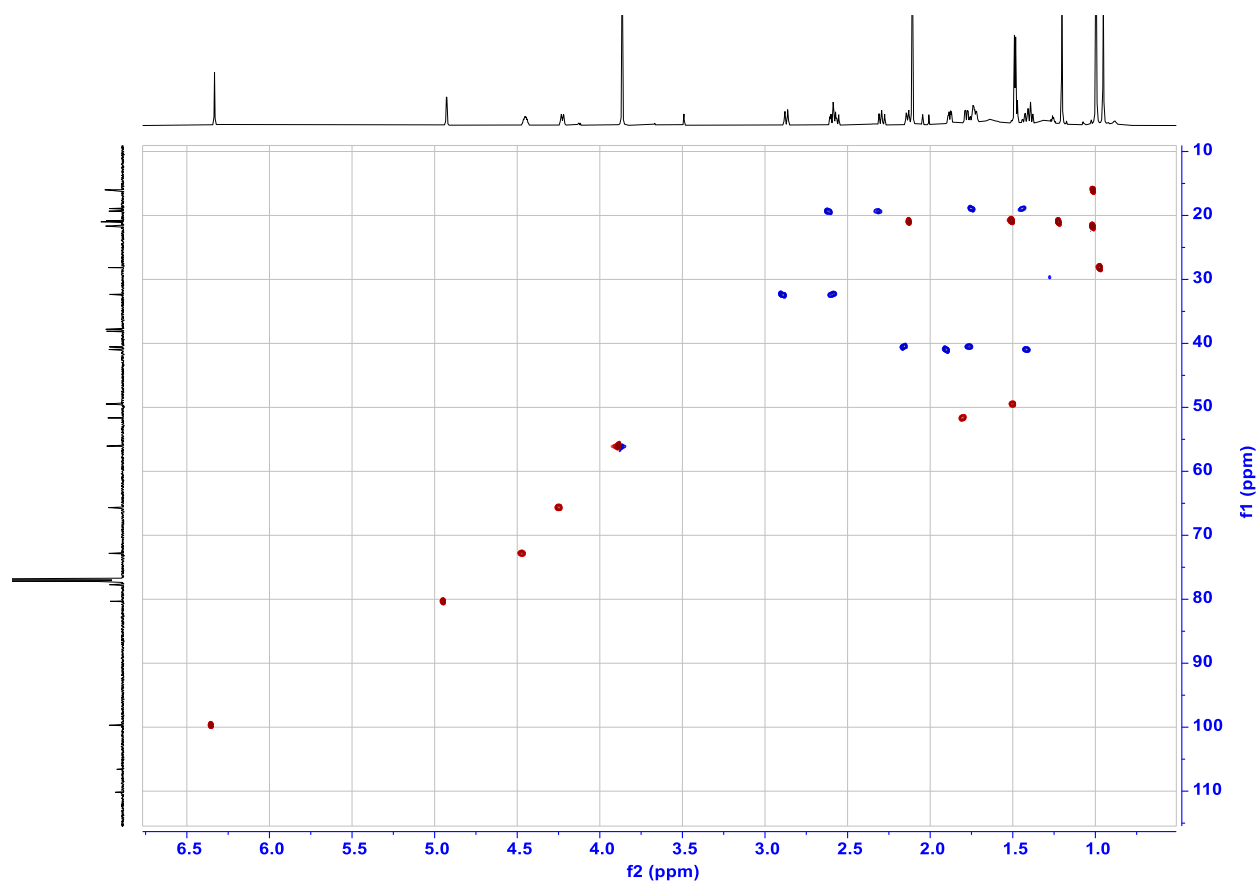

**Figure S13.** HSQC spectrum of **2**

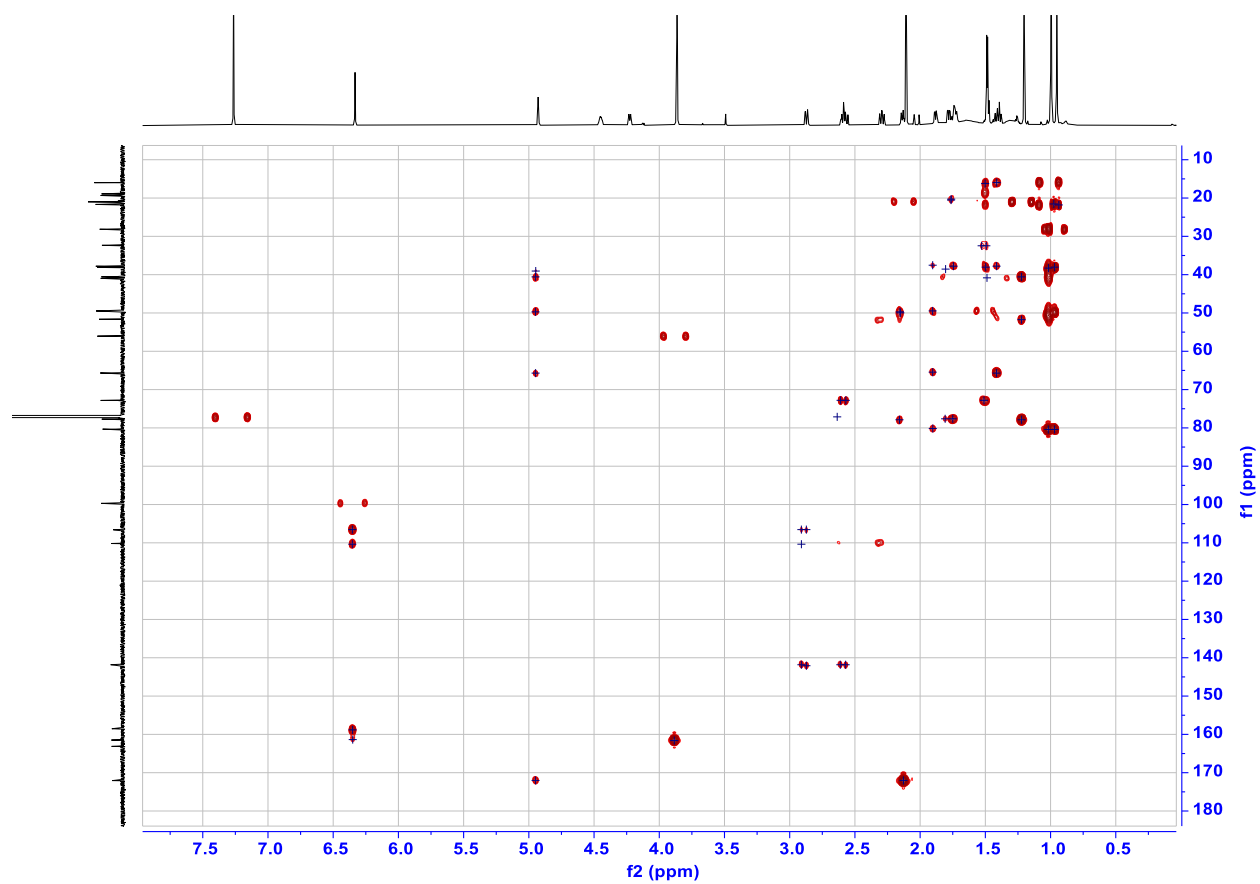

**Figure S14.** HMBC spectrum of **2**

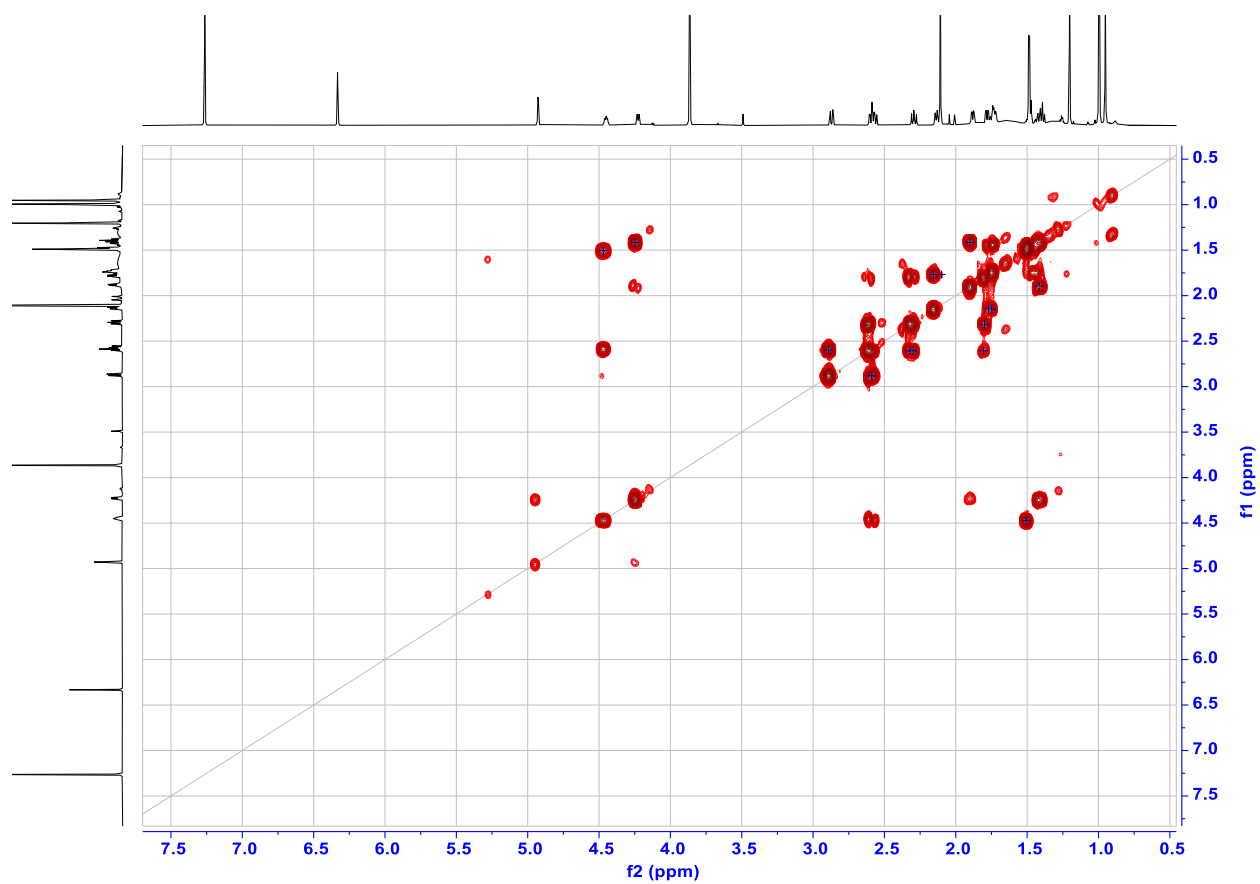

**Figure S15.** COSY spectrum of **2**

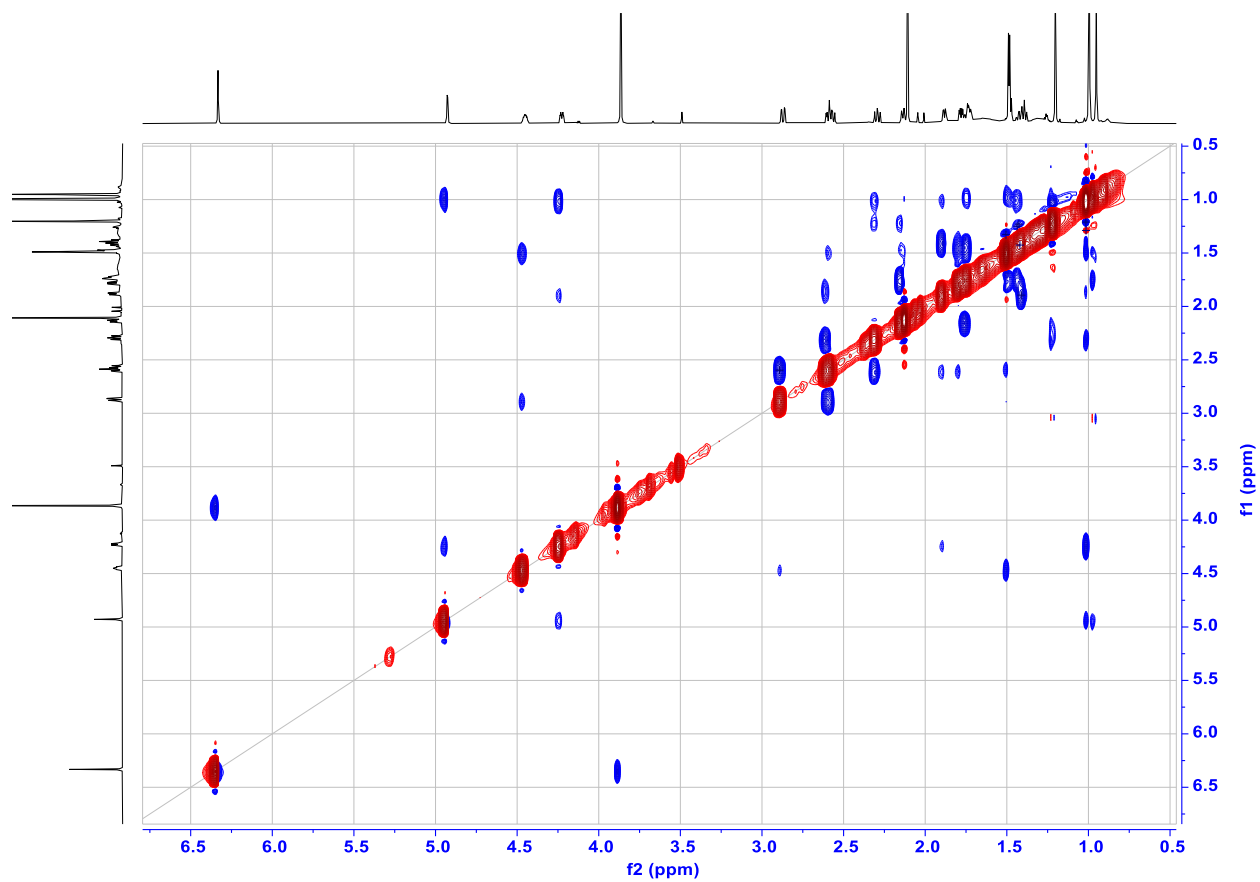

**Figure S16.** NOESY spectrum of **2**

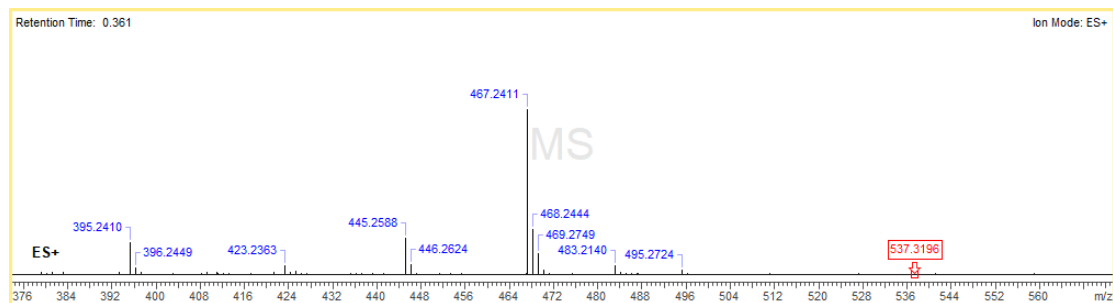

**Figure S17.** MS spectrum of **3**



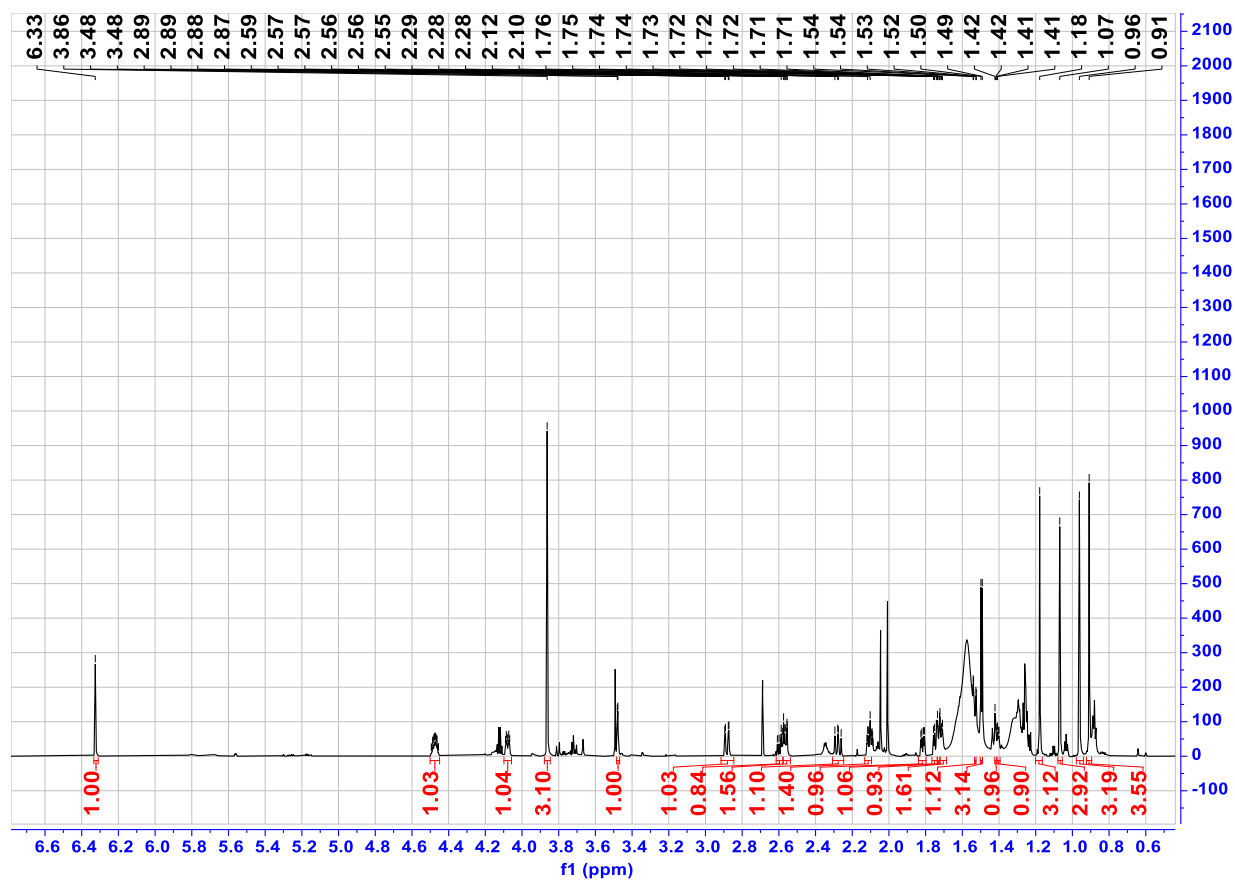

**Figure S18.**  $^1\text{H}$  NMR spectrum of **3**

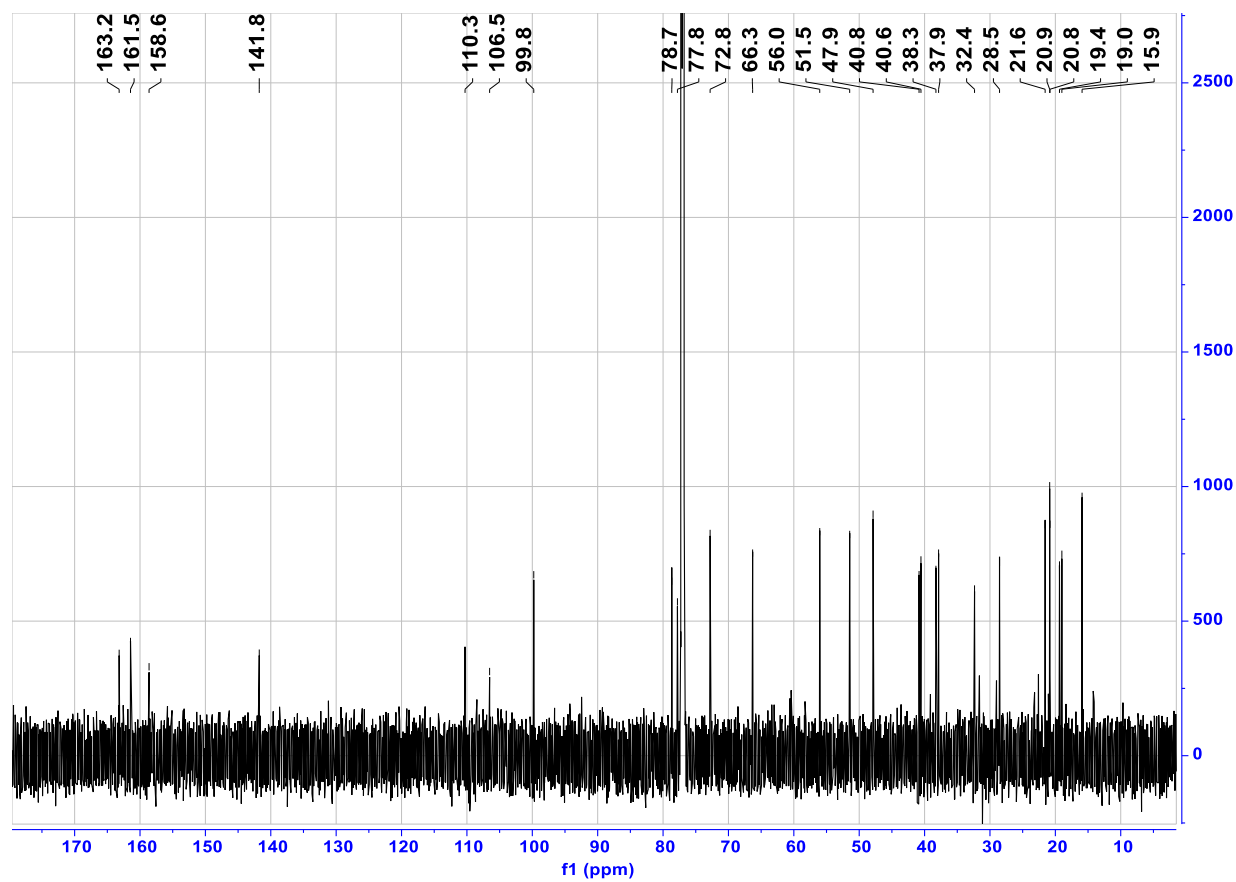

**Figure S19.** <sup>13</sup>C NMR spectrum of **3**

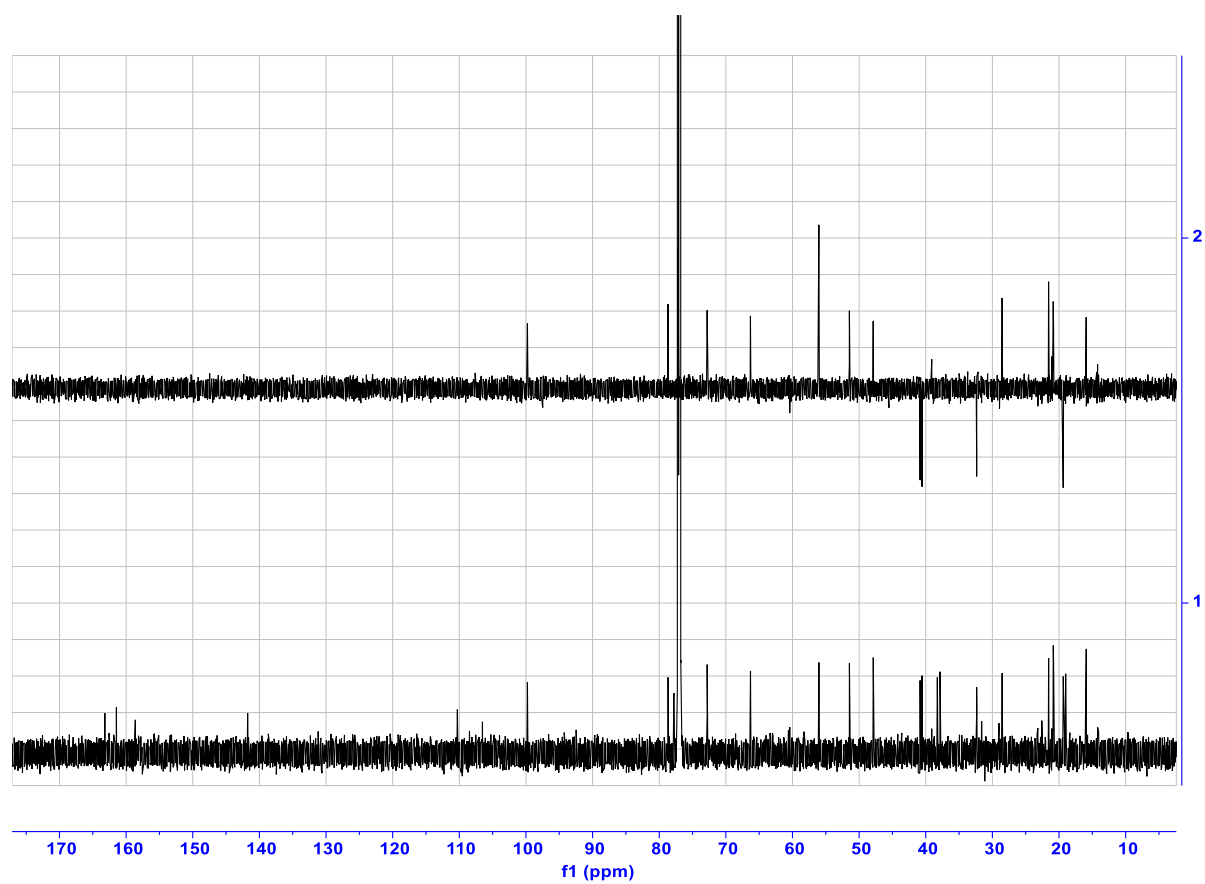

**Figure S20.** DEPT spectrum of **3**

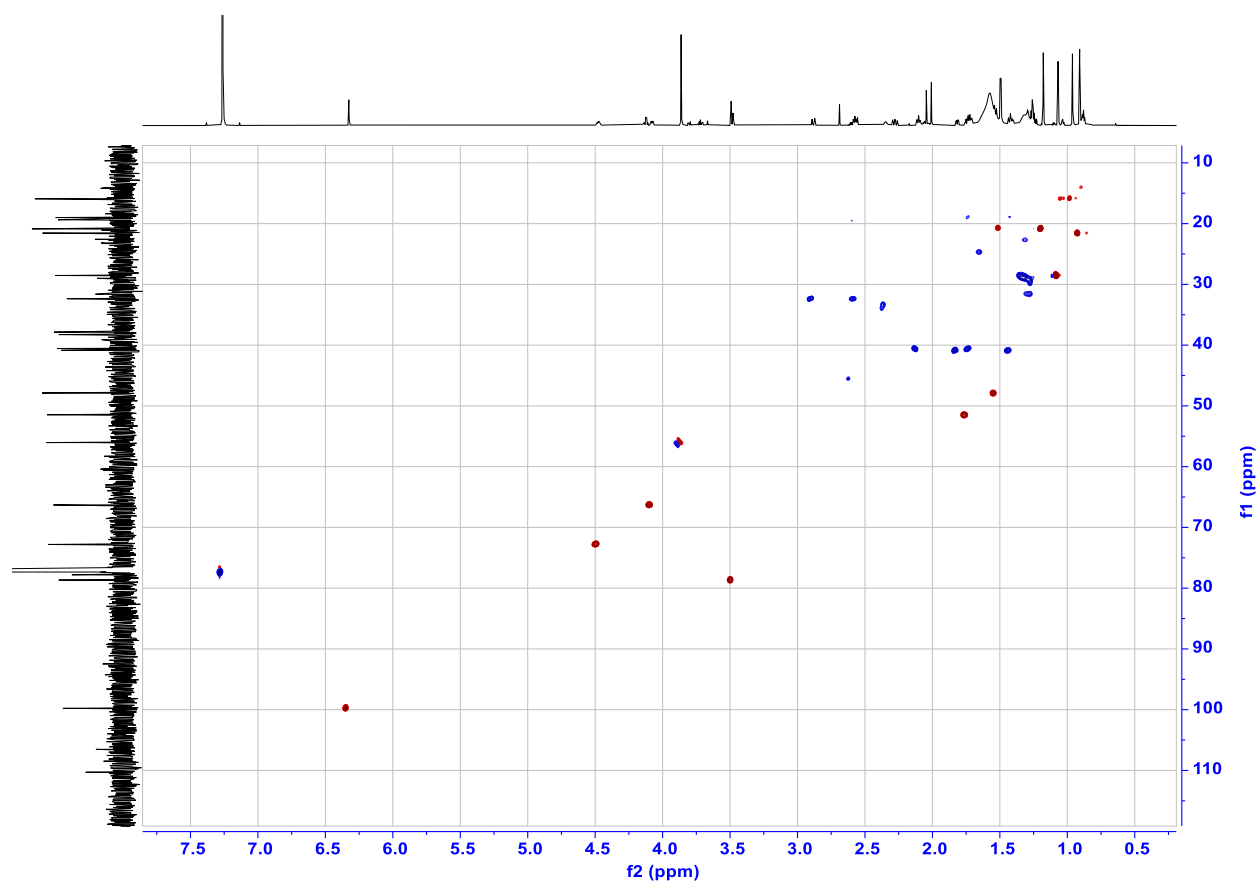

**Figure S21.** HSQC spectrum of **3**

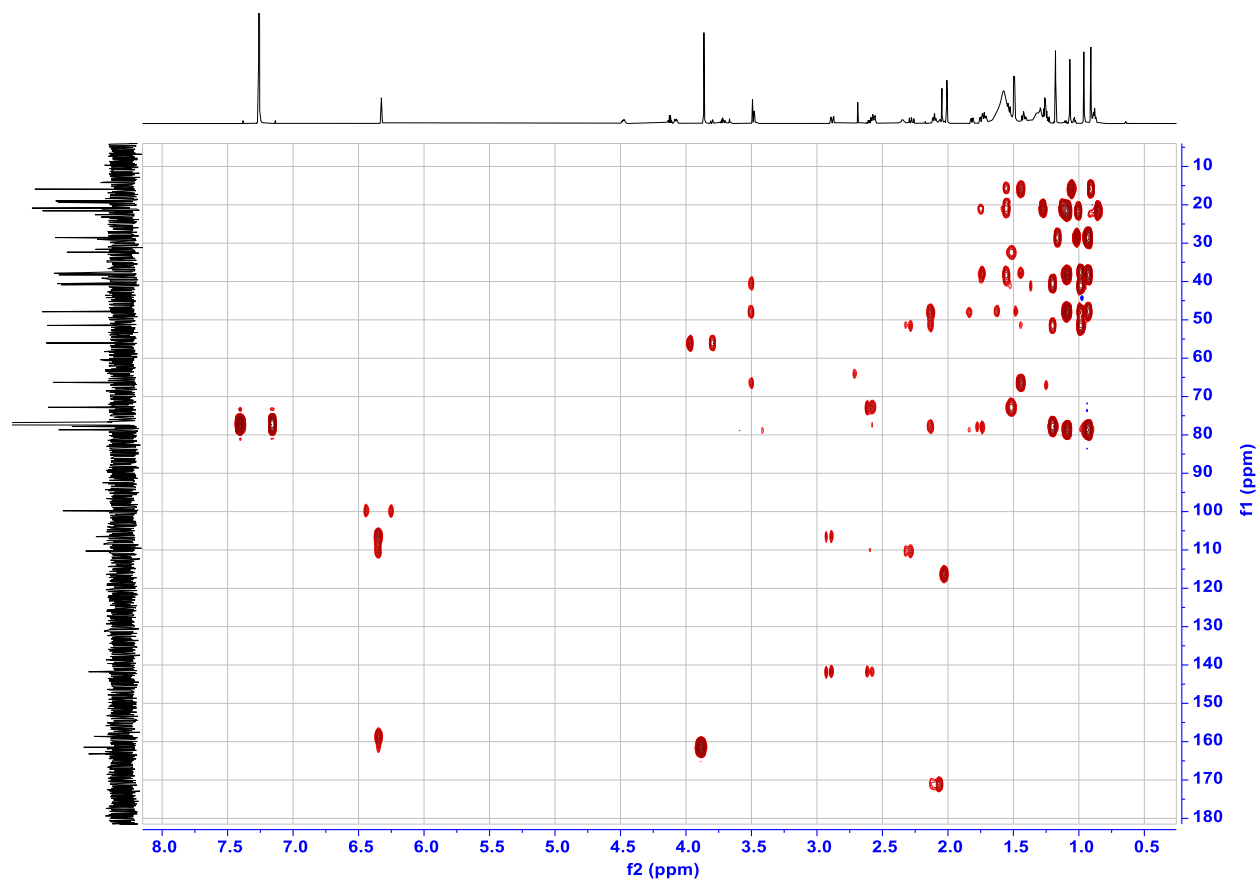

Figure S22. HMBC spectrum of **3**

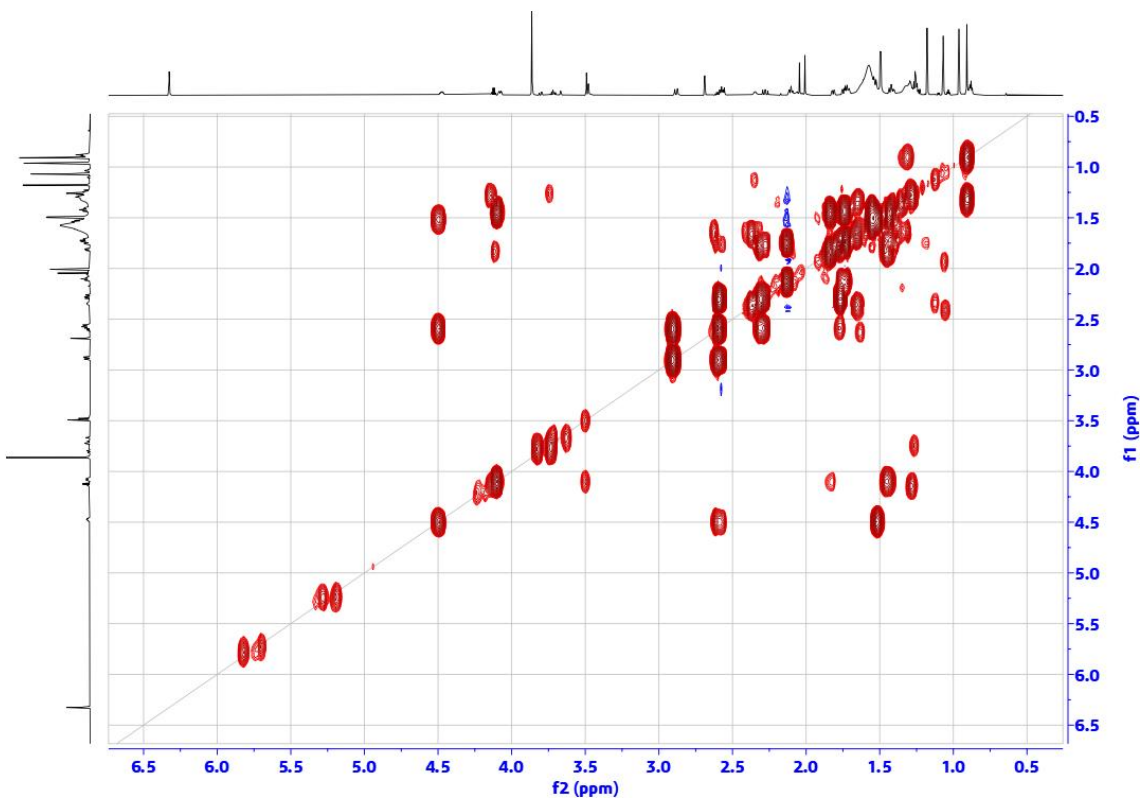

**Figure S23.** COSY spectrum of **3**

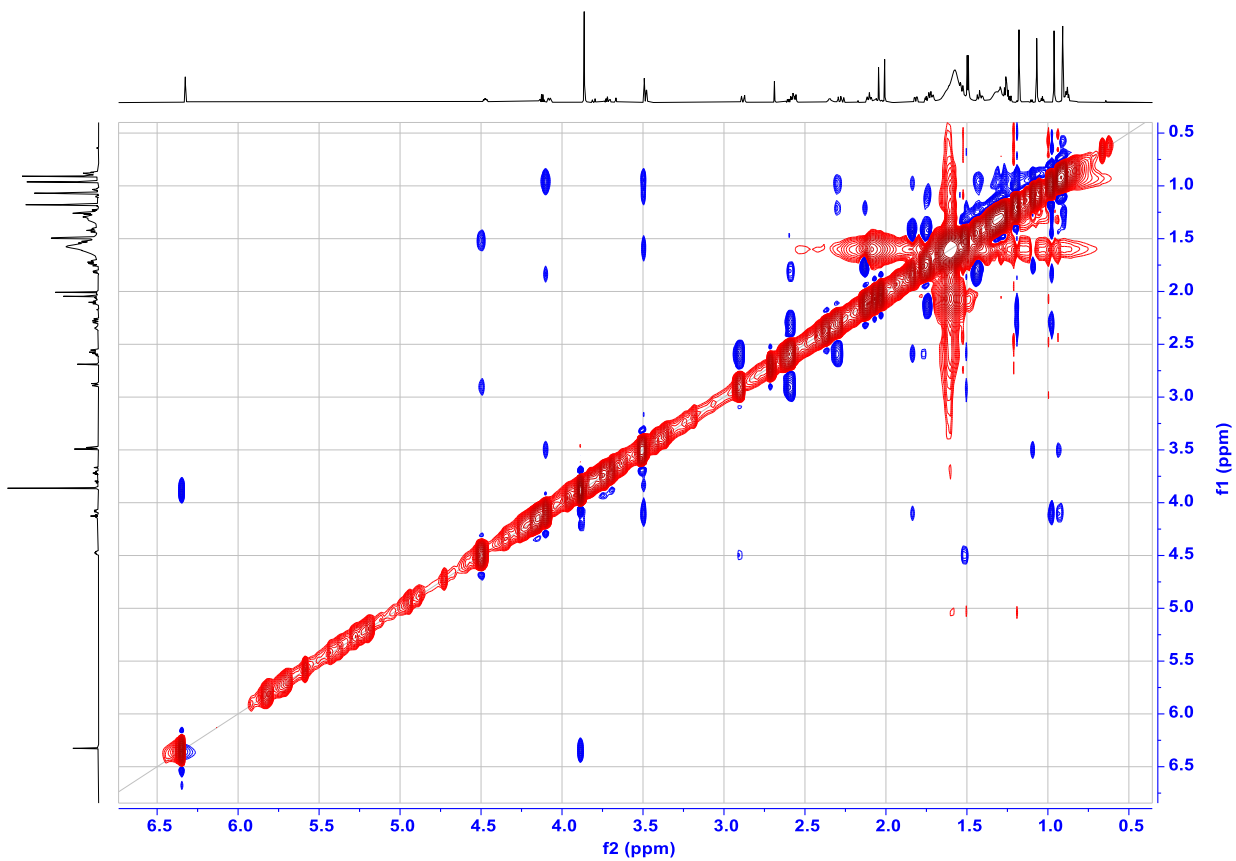

**Figure S24.** NOESY spectrum of **3**

**Table S1.** Experimental and calculated  $^{13}\text{C}$ -NMR chemical shifts of 8'R-1

| No. | $\delta_{\text{exptl.}}$ | 8'R-1- $\delta_{\text{calcd.}}$ |
|-----|--------------------------|---------------------------------|
| 1   | 36.9                     | 37.7                            |
| 2   | 70.9                     | 73.5                            |
| 3   | 76.5                     | 76.1                            |
| 4   | 38.5                     | 42.8                            |
| 5   | 47.9                     | 48.7                            |
| 6   | 18.9                     | 21.0                            |
| 7   | 40.4                     | 40.5                            |
| 8   | 77.9                     | 77.6                            |
| 9   | 51.2                     | 52.6                            |
| 10  | 38.0                     | 40.2                            |
| 11  | 19.4                     | 23.2                            |
| 12  | 21.0                     | 21.5                            |
| 13  | 28.4                     | 29.1                            |
| 14  | 21.7                     | 20.6                            |
| 15  | 15.8                     | 17.6                            |
| 16  | 170.4                    | 168.1                           |
| 17  | 21.4                     | 22.0                            |
| 1'  | 110.7                    | 112.4                           |
| 2'  | 139.1                    | 138.6                           |
| 3'  | 101.7                    | 101.5                           |
| 4'  | 162.2                    | 159.1                           |
| 5'  | 103.4                    | 99.7                            |
| 6'  | 160.4                    | 157.7                           |
| 7'  | 31.4                     | 33.0                            |
| 8'  | 74.7                     | 74.8                            |
| 9'  | 20.9                     | 21.1                            |
| 10' | 170.1                    | 166.5                           |

**Table S2.** Experimental and calculated  $^1\text{H}$ -NMR chemical shifts of 8'R-1

| No. | $\delta_{\text{exptl.}}$ | 8'R-1- $\delta_{\text{calcd.}}$ |
|-----|--------------------------|---------------------------------|
| 1a  | 1.8                      | 1.59                            |
| 1b  | 1.58                     | 1.23                            |
| 2   | 5.25                     | 5.12                            |
| 3   | 3.53                     | 3.45                            |
| 5   | 1.64                     | 1.74                            |
| 6a  | 1.72                     | 1.6                             |
| 6b  | 1.4                      | 1.44                            |
| 7a  | 2.09                     | 1.95                            |
| 7b  | 1.72                     | 1.52                            |
| 9   | 1.76                     | 1.49                            |
| 11a | 2.48                     | 2.28                            |
| 11b | 2.25                     | 2.16                            |
| 12  | 1.17                     | 0.99                            |
| 13  | 1.07                     | 0.93                            |
| 14  | 0.95                     | 0.85                            |
| 15  | 1.01                     | 0.96                            |
| 17  | 2.11                     | 1.95                            |
| 5'  | 6.28                     | 6.37                            |



|     |      |      |
|-----|------|------|
| 7'a | 2.95 | 2.79 |
| 7'b | 2.61 | 2.5  |
| 8'  | 4.63 | 4.54 |
| 9'  | 1.55 | 1.22 |

**Table S3.** Conformational analysis of the B3LYP/6-31G(d) optimized conformers of 8'R-1 in the gas phase (T=298.15 K)

| Conformer | E <sup>a</sup> (Hartree) | C <sup>b</sup> (Hartree) | G <sup>c</sup> (kcal/mol) | ΔG <sup>d</sup> (kcal/mol) | Population <sup>e</sup> |
|-----------|--------------------------|--------------------------|---------------------------|----------------------------|-------------------------|
| 8'R-1-1   | -1577.049219             | 0.530345                 | -989265.593272            | 0.0                        | 40.06%                  |
| 8'R-1-2   | -1577.048494             | 0.529699                 | -989265.544019            | 0.049252                   | 36.86%                  |
| 8'R-1-3   | -1577.047647             | 0.529636                 | -989265.051764            | 0.541507                   | 16.05%                  |
| 8'R-1-4   | -1577.046857             | 0.529627                 | -989264.561994            | 1.031277                   | 7.02%                   |

<sup>a</sup>Electronic energy obtained at M062X/6-311+G(2d,p) level of theory; <sup>b</sup>Thermal correction to Gibbs free energy obtained at B3LYP/6-31G(d) level of theory; <sup>c</sup>Gibbs free energy (E + C); <sup>d</sup>The relative Gibbs free energy; <sup>e</sup>The Boltzmann distribution of each conformer.

**Table S4.** Atomic coordinates (Å) of 8'R-1-1 obtained at the B3LYP/6-31G(d) level of theory in the gas phase.

|   |           |           |           |   |           |           |           |
|---|-----------|-----------|-----------|---|-----------|-----------|-----------|
| C | -2.136713 | 0.870693  | -0.072247 | H | -2.527133 | -1.496531 | -1.256705 |
| C | -3.617733 | 1.221491  | 0.003601  | H | 3.995447  | 2.670437  | -1.133564 |
| C | -4.496622 | 0.207207  | -0.722226 | H | 3.327255  | 1.824751  | 1.723619  |
| C | -4.308954 | -1.224657 | -0.168616 | H | 2.175528  | 2.239129  | 0.460022  |
| C | -2.786699 | -1.564284 | -0.191511 | H | 3.597223  | -3.315998 | -1.018746 |
| C | -2.443250 | -3.000109 | 0.236367  | H | 0.674756  | 0.219123  | 1.593226  |
| C | -1.009974 | -3.356100 | -0.170893 | H | 0.534082  | 1.023012  | 0.048682  |
| C | 0.025244  | -2.376513 | 0.385524  | H | -2.578371 | -3.133461 | 1.316243  |
| C | -0.384507 | -0.923584 | 0.064683  | H | -3.122065 | -3.711096 | -0.242677 |
| C | -1.834845 | -0.533495 | 0.503823  | H | -0.751730 | -4.374588 | 0.141371  |
| C | 0.716830  | 0.046956  | 0.509773  | H | -0.931732 | -3.328833 | -1.264192 |
| C | 0.353595  | -2.674810 | 1.851917  | H | -1.572382 | 1.638856  | 0.464356  |
| C | -5.070809 | -2.185766 | -1.106050 | H | -1.839910 | 0.905869  | -1.126464 |
| C | -4.969479 | -1.326092 | 1.219520  | H | -3.944044 | 1.346775  | 1.036159  |
| C | -1.982009 | -0.473708 | 2.044794  | H | -5.550839 | 0.499598  | -0.586256 |
| C | -3.618972 | 3.619488  | 0.030240  | H | 6.489746  | -1.278870 | -0.856459 |
| C | -3.893809 | 4.842051  | -0.810639 | H | 4.545630  | 4.035903  | 1.559763  |
| C | 2.090062  | -0.451470 | 0.116222  | H | 5.112695  | 4.605333  | -0.023266 |
| C | 3.217348  | 0.367400  | 0.146220  | H | 3.372325  | 4.589414  | 0.342144  |
| C | 4.485113  | -0.108852 | -0.252655 | H | -1.052096 | -0.149000 | 2.518002  |
| C | 4.625859  | -1.459677 | -0.674335 | H | -2.744109 | 0.245420  | 2.350510  |
| C | 3.502029  | -2.281627 | -0.711222 | H | -2.252744 | -1.435120 | 2.484367  |
| C | 2.262053  | -1.788199 | -0.313784 | H | 0.810981  | -3.667065 | 1.907298  |
| C | 3.158792  | 1.793141  | 0.636912  | H | 1.062824  | -1.953879 | 2.267323  |
| C | 4.212705  | 2.644442  | -0.056734 | H | -0.540025 | -2.674434 | 2.476997  |
| C | 4.317630  | 4.056411  | 0.489067  | H | -4.191047 | 1.132241  | -2.393287 |
| C | 5.675122  | 0.739451  | -0.184549 | H | -4.585480 | -2.265956 | -2.081308 |
| O | -3.852646 | 2.487792  | -0.679136 | H | -5.150170 | -3.184917 | -0.667120 |
| O | 5.809465  | -1.981635 | -1.027137 | H | -6.090164 | -1.818455 | -1.270828 |
| O | -4.176326 | 0.203147  | -2.111740 | H | -4.610041 | -0.584940 | 1.934490  |
| O | 6.820038  | 0.319842  | -0.353005 | H | -6.053418 | -1.193583 | 1.124335  |
| O | 1.231547  | -2.668709 | -0.379176 | H | -4.799690 | -2.315851 | 1.654874  |
| O | -3.240120 | 3.624968  | 1.180144  | H | -3.742201 | 5.738454  | -0.209039 |
| O | 5.525909  | 2.052700  | 0.096166  | H | -3.222283 | 4.858555  | -1.675602 |

|   |           |           |           |   |           |          |           |
|---|-----------|-----------|-----------|---|-----------|----------|-----------|
| H | -0.398604 | -0.889731 | -1.033775 | H | -4.919193 | 4.815854 | -1.192652 |
|---|-----------|-----------|-----------|---|-----------|----------|-----------|

**Table S5.** Atomic coordinates (Å) of 8'R-1-2 obtained at the B3LYP/6-31G(d) level of theory in the gas phase.

|   |           |           |           |   |           |           |           |
|---|-----------|-----------|-----------|---|-----------|-----------|-----------|
| C | -2.179935 | 0.880776  | -0.146369 | H | -2.522105 | -1.566214 | -1.181229 |
| C | -3.668830 | 1.190885  | -0.052510 | H | 4.356525  | 3.644089  | 0.847922  |
| C | -4.532215 | 0.111212  | -0.697938 | H | 2.277353  | 2.192933  | 1.019314  |
| C | -4.288096 | -1.280629 | -0.069636 | H | 2.788376  | 2.589236  | -0.618041 |
| C | -2.756881 | -1.576150 | -0.108156 | H | 3.628726  | -3.154851 | -1.120119 |
| C | -2.360173 | -2.971044 | 0.399710  | H | 0.689453  | 0.410386  | 1.476899  |
| C | -0.925735 | -3.310852 | -0.017637 | H | 0.489212  | 1.120221  | -0.109218 |
| C | 0.093242  | -2.268313 | 0.448530  | H | -2.468830 | -3.040660 | 1.488581  |
| C | -0.371130 | -0.850553 | 0.049047  | H | -3.026826 | -3.730180 | -0.018560 |
| C | -1.821967 | -0.477761 | 0.501444  | H | -0.630112 | -4.299448 | 0.352274  |
| C | 0.709087  | 0.178513  | 0.403519  | H | -0.872656 | -3.351486 | -1.112085 |
| C | 0.468930  | -2.462851 | 1.920849  | H | -1.626641 | 1.694618  | 0.331330  |
| C | -5.039618 | -2.315533 | -0.934158 | H | -1.909031 | 0.863809  | -1.207858 |
| C | -4.915134 | -1.323229 | 1.337153  | H | -3.974114 | 1.364601  | 0.979483  |
| C | -1.936697 | -0.332008 | 2.039879  | H | -5.591618 | 0.379652  | -0.552934 |
| C | -3.751794 | 3.584872  | -0.154879 | H | 6.383642  | -0.947452 | -1.437014 |
| C | -4.082244 | 4.750080  | -1.054892 | H | 3.980423  | 2.369854  | 2.945976  |
| C | 2.084022  | -0.305067 | -0.001567 | H | 4.747456  | 0.934034  | 2.236774  |
| C | 3.177809  | 0.553255  | -0.069078 | H | 5.708110  | 2.399550  | 2.529136  |
| C | 4.439849  | 0.106302  | -0.512944 | H | -1.006684 | 0.044936  | 2.472650  |
| C | 4.597775  | -1.244998 | -0.926204 | H | -2.712497 | 0.382634  | 2.320814  |
| C | 3.515668  | -2.117429 | -0.829240 | H | -2.170719 | -1.273286 | 2.539745  |
| C | 2.284737  | -1.655800 | -0.369120 | H | 0.949633  | -3.439748 | 2.027618  |
| C | 3.063773  | 2.016972  | 0.279248  | H | 1.173890  | -1.701766 | 2.266328  |
| C | 4.383345  | 2.551599  | 0.829374  | H | -0.406561 | -2.438543 | 2.570508  |
| C | 4.726999  | 2.027995  | 2.220657  | H | -4.291363 | 0.948065  | -2.425403 |
| C | 5.583599  | 1.014674  | -0.594994 | H | -4.576404 | -2.431532 | -1.916543 |
| O | -3.958947 | 2.409116  | -0.797922 | H | -5.073573 | -3.291893 | -0.441231 |
| O | 5.760547  | -1.719526 | -1.396107 | H | -6.074763 | -1.991235 | -1.090707 |
| O | -4.243958 | 0.037218  | -2.092504 | H | -6.004330 | -1.227394 | 1.260024  |
| O | 6.652585  | 0.711632  | -1.125294 | H | -4.706446 | -2.281459 | 1.823286  |
| O | 1.288026  | -2.575374 | -0.328516 | H | -4.562319 | -0.533136 | 2.001108  |
| O | -3.353270 | 3.665110  | 0.985582  | H | -5.109414 | 4.664736  | -1.423140 |
| O | 5.473320  | 2.259989  | -0.082447 | H | -3.959074 | 5.682037  | -0.502901 |
| H | -0.413421 | -0.886392 | -1.048443 | H | -3.420028 | 4.746460  | -1.927188 |

**Table S6.** Atomic coordinates (Å) of 8'R-1-3 obtained at the B3LYP/6-31G(d) level of theory in the gas phase.

|   |           |           |           |   |           |           |           |
|---|-----------|-----------|-----------|---|-----------|-----------|-----------|
| C | -2.041179 | 0.837331  | -0.024824 | H | -2.357108 | -1.514415 | -1.261982 |
| C | -3.529816 | 1.136027  | 0.068820  | H | 4.020155  | 2.857358  | -1.066215 |
| C | -4.378868 | 0.109884  | -0.681731 | H | 3.395040  | 1.931502  | 1.775833  |
| C | -4.144912 | -1.328494 | -0.166073 | H | 2.223589  | 2.332040  | 0.525288  |
| C | -2.612106 | -1.615557 | -0.198547 | H | 3.823913  | -3.137725 | -1.080305 |
| C | -2.219934 | -3.047482 | 0.196455  | H | 0.795579  | 0.237054  | 1.621497  |
| C | -0.777239 | -3.349464 | -0.221453 | H | 0.625094  | 1.071568  | 0.095286  |
| C | 0.227395  | -2.349710 | 0.354900  | H | -2.346727 | -3.209066 | 1.273380  |
| C | -0.231060 | -0.903662 | 0.069629  | H | -2.877650 | -3.768971 | -0.295829 |
| C | -1.692923 | -0.569978 | 0.518975  | H | -0.486012 | -4.365779 | 0.068134  |
| C | 0.839779  | 0.091744  | 0.534058  | H | -0.702046 | -3.296040 | -1.314000 |

|   |           |           |           |   |           |           |           |
|---|-----------|-----------|-----------|---|-----------|-----------|-----------|
| C | 0.571944  | -2.672255 | 1.812662  | H | -1.493584 | 1.613234  | 0.521194  |
| C | -4.873684 | -2.289565 | -1.129804 | H | -1.745849 | 0.905378  | -1.077820 |
| C | -4.802481 | -1.489946 | 1.217719  | H | -3.872130 | 1.221420  | 1.099264  |
| C | -1.839723 | -0.551545 | 2.059950  | H | -5.440320 | 0.366535  | -0.537232 |
| C | -4.714859 | 3.222808  | -0.044517 | H | 6.647719  | -1.009509 | -0.882402 |
| C | -4.825509 | 4.510503  | -0.823365 | H | 4.535967  | 4.186300  | 1.652115  |
| C | 2.227415  | -0.351558 | 0.125123  | H | 5.077572  | 4.805863  | 0.079092  |
| C | 3.326607  | 0.503980  | 0.168712  | H | 3.340281  | 4.724948  | 0.449243  |
| C | 4.607768  | 0.079386  | -0.245195 | H | -2.640113 | 0.117583  | 2.380992  |
| C | 4.791587  | -1.256408 | -0.697116 | H | -2.061948 | -1.534314 | 2.478495  |
| C | 3.695586  | -2.114457 | -0.748679 | H | -0.926164 | -0.191679 | 2.540348  |
| C | 2.441493  | -1.671615 | -0.336357 | H | 1.067210  | -3.647333 | 1.840827  |
| C | 3.222278  | 1.916472  | 0.689401  | H | 1.255009  | -1.936052 | 2.244985  |
| C | 4.243426  | 2.817082  | 0.008919  | H | -0.318286 | -2.723561 | 2.440869  |
| C | 4.303212  | 4.220559  | 0.582760  | H | -4.041420 | 1.092025  | -2.315382 |
| C | 5.768757  | 0.965819  | -0.164038 | H | -4.915268 | -3.303678 | -0.720681 |
| O | -3.737365 | 2.433568  | -0.565548 | H | -5.906285 | -1.955056 | -1.281093 |
| O | 5.990358  | -1.730603 | -1.065544 | H | -4.388780 | -2.323042 | -2.108073 |
| O | -4.055884 | 0.152283  | -2.071044 | H | -4.595922 | -2.484069 | 1.626869  |
| O | 6.926323  | 0.589045  | -0.345726 | H | -4.474404 | -0.753727 | 1.952405  |
| O | 1.439912  | -2.583071 | -0.420155 | H | -5.890007 | -1.393588 | 1.123647  |
| O | -5.392924 | 2.916813  | 0.909648  | H | -5.146784 | 4.298207  | -1.848882 |
| O | 5.576282  | 2.267285  | 0.144975  | H | -5.551766 | 5.165293  | -0.341480 |
| H | -0.249169 | -0.844765 | -1.027709 | H | -3.850715 | 5.004105  | -0.881841 |

**Table S7.** Atomic coordinates (Å) of 8'R-1-4 obtained at the B3LYP/6-31G(d) level of theory in the gas phase.

|   |           |           |           |   |           |           |           |
|---|-----------|-----------|-----------|---|-----------|-----------|-----------|
| C | -2.083833 | 0.864485  | -0.102874 | H | -2.361544 | -1.569605 | -1.187077 |
| C | -3.577599 | 1.129633  | 0.006708  | H | 4.384259  | 3.778757  | 0.938682  |
| C | -4.414011 | 0.038283  | -0.661474 | H | 2.347727  | 2.265515  | 1.090612  |
| C | -4.131389 | -1.359571 | -0.065667 | H | 2.832211  | 2.718175  | -0.540522 |
| C | -2.592379 | -1.609438 | -0.114005 | H | 3.826775  | -2.987114 | -1.192662 |
| C | -2.154447 | -3.002169 | 0.363019  | H | 0.807212  | 0.431925  | 1.507443  |
| C | -0.713384 | -3.294929 | -0.066724 | H | 0.580756  | 1.174931  | -0.060886 |
| C | 0.278727  | -2.235316 | 0.417814  | H | -2.256265 | -3.097766 | 1.450479  |
| C | -0.226487 | -0.821605 | 0.053278  | H | -2.802631 | -3.769932 | -0.068044 |
| C | -1.686620 | -0.497693 | 0.515943  | H | -0.389590 | -4.282712 | 0.281113  |
| C | 0.827646  | 0.227340  | 0.428372  | H | -0.663596 | -3.311169 | -1.161932 |
| C | 0.669600  | -2.453298 | 1.883099  | H | -1.545622 | 1.684726  | 0.384340  |
| C | -4.853762 | -2.395768 | -0.953338 | H | -1.812082 | 0.877142  | -1.164183 |
| C | -4.756453 | -1.451845 | 1.339666  | H | -3.899688 | 1.267507  | 1.037998  |
| C | -1.801158 | -0.389201 | 2.056320  | H | -5.478716 | 0.276385  | -0.509041 |
| C | -4.818941 | 3.175949  | -0.200134 | H | 6.518388  | -0.698469 | -1.473444 |
| C | -4.983748 | 4.409772  | -1.052959 | H | 4.061421  | 2.441716  | 3.006766  |
| C | 2.213233  | -0.208734 | 0.005427  | H | 4.861870  | 1.046429  | 2.254774  |
| C | 3.283021  | 0.680275  | -0.047088 | H | 5.783891  | 2.530312  | 2.577064  |
| C | 4.553574  | 0.279056  | -0.509887 | H | -0.889436 | 0.026904  | 2.492962  |
| C | 4.745043  | -1.056858 | -0.957683 | H | -2.615515 | 0.273679  | 2.354307  |
| C | 3.687725  | -1.960667 | -0.875377 | H | -1.983222 | -1.350986 | 2.537867  |
| C | 2.447916  | -1.544071 | -0.396671 | H | 1.178313  | -3.418452 | 1.963585  |
| C | 3.131777  | 2.131083  | 0.339267  | H | 1.355874  | -1.681397 | 2.242067  |
| C | 4.440981  | 2.688204  | 0.892168  | H | -0.201193 | -2.469861 | 2.539590  |

|   |           |           |           |   |           |           |           |
|---|-----------|-----------|-----------|---|-----------|-----------|-----------|
| C | 4.810873  | 2.139403  | 2.266962  | H | -4.137814 | 0.927574  | -2.358869 |
| C | 5.671252  | 1.220397  | -0.578159 | H | -4.857925 | -3.384350 | -0.483980 |
| O | -3.834657 | 2.380513  | -0.698445 | H | -5.898335 | -2.098394 | -1.099791 |
| O | 5.916646  | -1.487824 | -1.446867 | H | -4.389893 | -2.474549 | -1.939210 |
| O | -4.121611 | 0.004472  | -2.057814 | H | -4.435361 | -0.661258 | 2.018810  |
| O | 6.743982  | 0.960028  | -1.122988 | H | -5.847916 | -1.392047 | 1.263174  |
| O | 1.476557  | -2.490667 | -0.372945 | H | -4.512946 | -2.411358 | 1.806918  |
| O | -5.464344 | 2.912419  | 0.788783  | H | -5.704464 | 5.080949  | -0.585467 |
| O | 5.530264  | 2.449942  | -0.035288 | H | -4.021902 | 4.915398  | -1.180678 |
| H | -0.270785 | -0.833183 | -1.044645 | H | -5.339892 | 4.127205  | -2.049653 |

**Table S8.** Experimental and calculated  $^{13}\text{C}$ -NMR chemical shifts of 8'S-1

| No. | $\delta_{\text{exptl.}}$ | 8S-1- $\delta_{\text{calcd.}}$ |
|-----|--------------------------|--------------------------------|
| 1   | 36.9                     | 37.7                           |
| 2   | 70.9                     | 73.3                           |
| 3   | 76.5                     | 76.0                           |
| 4   | 38.5                     | 42.9                           |
| 5   | 47.9                     | 49.1                           |
| 6   | 18.9                     | 20.7                           |
| 7   | 40.4                     | 40.7                           |
| 8   | 77.9                     | 77.4                           |
| 9   | 51.2                     | 52.0                           |
| 10  | 38.0                     | 40.3                           |
| 11  | 19.4                     | 23.1                           |
| 12  | 21.0                     | 21.5                           |
| 13  | 28.4                     | 29.0                           |
| 14  | 21.7                     | 20.4                           |
| 15  | 15.8                     | 17.8                           |
| 16  | 170.4                    | 168.1                          |
| 17  | 21.4                     | 22.1                           |
| 1'  | 110.7                    | 113.0                          |
| 2'  | 139.1                    | 139.1                          |
| 3'  | 101.7                    | 102.0                          |
| 4'  | 162.2                    | 159.2                          |
| 5'  | 103.4                    | 99.1                           |
| 6'  | 160.4                    | 157.3                          |
| 7'  | 31.4                     | 34.8                           |
| 8'  | 74.7                     | 74.6                           |
| 9'  | 20.9                     | 21.6                           |
| 10' | 170.1                    | 166.4                          |

**Table S9.** Experimental and calculated  $^1\text{H}$ -NMR chemical shifts of 8'S-1

| No. | $\delta_{\text{exptl.}}$ | 8S-1- $\delta_{\text{calcd.}}$ |
|-----|--------------------------|--------------------------------|
| 1a  | 1.8                      | 1.64                           |
| 1b  | 1.58                     | 1.22                           |
| 2   | 5.25                     | 5.14                           |
| 3   | 3.53                     | 3.46                           |
| 5   | 1.64                     | 1.73                           |
| 6a  | 1.72                     | 1.61                           |
| 6b  | 1.4                      | 1.44                           |
| 7a  | 2.09                     | 1.96                           |

|     |      |      |
|-----|------|------|
| 7b  | 1.72 | 1.53 |
| 9   | 1.76 | 1.52 |
| 11a | 2.48 | 2.34 |
| 11b | 2.25 | 2.12 |
| 12  | 1.17 | 1.02 |
| 13  | 1.07 | 0.95 |
| 14  | 0.95 | 0.86 |
| 15  | 1.01 | 0.97 |
| 17  | 2.11 | 1.96 |
| 5'  | 6.28 | 6.36 |
| 7'a | 2.95 | 2.57 |
| 7'b | 2.61 | 2.53 |
| 8'  | 4.63 | 4.42 |
| 9'  | 1.55 | 1.34 |

**Table S10.** Conformational analysis of the B3LYP/6-31G(d) optimized conformers of 8'S-1 in the gas phase (T=298.15 K)

| Conformer | E <sup>a</sup> (Hartree) | C <sup>b</sup> (Hartree) | G <sup>c</sup> (kcal/mol) | ΔG <sup>d</sup> (kcal/mol) | Population <sup>e</sup> |
|-----------|--------------------------|--------------------------|---------------------------|----------------------------|-------------------------|
| 8S-1-1    | -1577.04992              | 0.529763                 | -989266.398794            | 0.0                        | 76.30%                  |
| 8S-1-2    | -1577.048304             | 0.529386                 | -989265.620963            | 0.77783                    | 20.51%                  |
| 8S-1-3    | -1577.048033             | 0.53087                  | -989264.519739            | 1.879055                   | 3.19%                   |

<sup>a</sup>Electronic energy obtained at M062X/6-311+G(2d,p) level of theory; <sup>b</sup>Thermal correction to Gibbs free energy obtained at B3LYP/6-31G(d) level of theory; <sup>c</sup>Gibbs free energy (E + C); <sup>d</sup>The relative Gibbs free energy; <sup>e</sup>The Boltzmann distribution of each conformer.

**Table S11.** Atomic coordinates (Å) of 8'S-1-1 obtained at the B3LYP/6-31G(d) level of theory in the gas phase.

|   |           |           |           |   |           |           |           |
|---|-----------|-----------|-----------|---|-----------|-----------|-----------|
| C | -2.136865 | 0.879585  | -0.136635 | H | -2.543178 | -1.552675 | -1.181194 |
| C | -3.615819 | 1.240385  | -0.071671 | H | 4.690357  | 1.772420  | 1.874515  |
| C | -4.503057 | 0.189922  | -0.732747 | H | 2.359315  | 2.021404  | 1.156676  |
| C | -4.317749 | -1.208855 | -0.100073 | H | 2.862925  | 2.439113  | -0.479758 |
| C | -2.796945 | -1.556160 | -0.112367 | H | 3.548237  | -3.342486 | -1.018722 |
| C | -2.455837 | -2.965196 | 0.398273  | H | 0.686301  | 0.308060  | 1.541951  |
| C | -1.026184 | -3.349838 | 0.004366  | H | 0.535469  | 1.033136  | -0.042574 |
| C | 0.017670  | -2.342937 | 0.493135  | H | -2.585848 | -3.034298 | 1.484929  |
| C | -0.391492 | -0.909435 | 0.089203  | H | -3.139515 | -3.700894 | -0.034320 |
| C | -1.836982 | -0.490562 | 0.516225  | H | -0.769348 | -4.348920 | 0.375038  |
| C | 0.715995  | 0.081587  | 0.467576  | H | -0.955308 | -3.387956 | -1.089197 |
| C | 0.356542  | -2.553259 | 1.972181  | H | -1.565850 | 1.674070  | 0.352498  |
| C | -5.089037 | -2.218177 | -0.977241 | H | -1.845646 | 0.853530  | -1.192505 |
| C | -4.969442 | -1.229853 | 1.295938  | H | -3.934707 | 1.425961  | 0.954142  |
| C | -1.975189 | -0.342245 | 2.052575  | H | -5.555347 | 0.493703  | -0.607437 |
| C | -3.610451 | 3.635645  | -0.178640 | H | 6.371895  | -1.220783 | -1.310405 |
| C | -3.879459 | 4.810249  | -1.086894 | H | 3.785627  | 4.102439  | 1.947228  |
| C | 2.080316  | -0.445848 | 0.082229  | H | 5.520526  | 4.101603  | 1.556660  |
| C | 3.202910  | 0.376407  | 0.035632  | H | 4.324234  | 4.364020  | 0.271593  |
| C | 4.456432  | -0.110623 | -0.390853 | H | -2.260393 | -1.272861 | 2.545875  |
| C | 4.575260  | -1.465322 | -0.807744 | H | -1.038627 | -0.006601 | 2.504641  |
| C | 3.465176  | -2.302663 | -0.726303 | H | -2.724697 | 0.405153  | 2.319884  |
| C | 2.242674  | -1.801573 | -0.284279 | H | 1.079370  | -1.817192 | 2.334413  |
| C | 3.130952  | 1.838437  | 0.402356  | H | -0.530975 | -2.500625 | 2.603640  |
| C | 4.468737  | 2.318832  | 0.947327  | H | 0.801495  | -3.546157 | 2.086100  |

|   |           |           |           |   |           |           |           |
|---|-----------|-----------|-----------|---|-----------|-----------|-----------|
| C | 4.528797  | 3.814453  | 1.196235  | H | -4.200967 | 1.016646  | -2.455480 |
| C | 5.621683  | 0.767857  | -0.486149 | H | -6.109240 | -1.858256 | -1.152832 |
| O | -3.849458 | 2.466903  | -0.823423 | H | -4.612353 | -2.351992 | -1.950865 |
| O | 5.727286  | -1.974545 | -1.268102 | H | -5.165933 | -3.191872 | -0.483954 |
| O | -4.191405 | 0.104976  | -2.121596 | H | -4.798728 | -2.193449 | 1.786295  |
| O | 6.681297  | 0.437507  | -1.018244 | H | -4.603736 | -0.450329 | 1.965425  |
| O | 1.216747  | -2.688758 | -0.260715 | H | -6.053805 | -1.100646 | 1.200852  |
| O | -3.230310 | 3.703756  | 0.968872  | H | -4.899345 | 4.759264  | -1.480719 |
| O | 5.536421  | 2.020413  | 0.014643  | H | -3.738251 | 5.738203  | -0.532464 |
| H | -0.414357 | -0.940744 | -1.009058 | H | -3.196023 | 4.783117  | -1.942278 |

**Table S12.** Atomic coordinates (Å) of 8'S-1-2 obtained at the B3LYP/6-31G(d) level of theory in the gas phase.

|   |           |           |           |   |           |           |           |
|---|-----------|-----------|-----------|---|-----------|-----------|-----------|
| C | -2.044083 | 0.850379  | -0.089732 | H | -2.372476 | -1.575210 | -1.180339 |
| C | -3.531463 | 1.157713  | -0.007786 | H | 4.767832  | 1.922391  | 1.908786  |
| C | -4.386010 | 0.090162  | -0.691148 | H | 2.424900  | 2.107699  | 1.212494  |
| C | -4.154474 | -1.314608 | -0.089789 | H | 2.901598  | 2.575797  | -0.418601 |
| C | -2.622706 | -1.608271 | -0.111331 | H | 3.770696  | -3.167242 | -1.085907 |
| C | -2.232886 | -3.013720 | 0.371775  | H | 0.808020  | 0.331671  | 1.569922  |
| C | -0.793614 | -3.345577 | -0.034494 | H | 0.627161  | 1.086726  | 0.001392  |
| C | 0.219646  | -2.314637 | 0.467909  | H | -2.356216 | -3.107408 | 1.457236  |
| C | -0.238198 | -0.887074 | 0.095628  | H | -2.894666 | -3.762630 | -0.071739 |
| C | -1.696006 | -0.522943 | 0.534515  | H | -0.502965 | -4.342334 | 0.316979  |
| C | 0.839221  | 0.130570  | 0.490367  | H | -0.726578 | -3.361850 | -1.128776 |
| C | 0.578010  | -2.543657 | 1.939689  | H | -1.492019 | 1.655280  | 0.407618  |
| C | -4.890468 | -2.330607 | -0.989575 | H | -1.752872 | 0.855943  | -1.145870 |
| C | -4.806816 | -1.387687 | 1.304110  | H | -3.868885 | 1.306090  | 1.017097  |
| C | -1.833662 | -0.411501 | 2.072795  | H | -5.446133 | 0.358688  | -0.558901 |
| C | -4.709684 | 3.238397  | -0.239381 | H | 6.522583  | -0.949885 | -1.348560 |
| C | -4.824435 | 4.474565  | -1.097034 | H | 5.519004  | 4.284021  | 1.630158  |
| C | 2.217743  | -0.344026 | 0.086775  | H | 4.303160  | 4.531540  | 0.360649  |
| C | 3.312809  | 0.514966  | 0.050994  | H | 3.788840  | 4.219159  | 2.035390  |
| C | 4.578517  | 0.078137  | -0.393366 | H | -2.045863 | -1.368657 | 2.551332  |
| C | 4.738167  | -1.262864 | -0.839995 | H | -0.920136 | -0.016093 | 2.524758  |
| C | 3.656151  | -2.137270 | -0.770257 | H | -2.637531 | 0.270056  | 2.356902  |
| C | 2.421060  | -1.685524 | -0.310631 | H | 1.279259  | -1.791600 | 2.311436  |
| C | 3.196080  | 1.966066  | 0.448748  | H | -0.304750 | -2.534679 | 2.579805  |
| C | 4.521621  | 2.479300  | 0.994112  | H | 1.057080  | -3.523061 | 2.029049  |
| C | 4.534205  | 3.970955  | 1.272378  | H | -4.051749 | 0.969186  | -2.383550 |
| C | 5.713843  | 0.995912  | -0.478032 | H | -4.934225 | -3.317218 | -0.518113 |
| O | -3.739396 | 2.414594  | -0.718622 | H | -5.922315 | -2.001837 | -1.157490 |
| O | 5.902764  | -1.724655 | -1.318025 | H | -4.409654 | -2.426555 | -1.965758 |
| O | -4.068146 | 0.046384  | -2.081609 | H | -5.894701 | -1.298045 | 1.207897  |
| O | 6.779911  | 0.711400  | -1.023199 | H | -4.598942 | -2.352915 | 1.776774  |
| O | 1.423841  | -2.604877 | -0.301252 | H | -4.476892 | -0.605446 | 1.988701  |
| O | -5.380089 | 2.994972  | 0.738006  | H | -3.846327 | 4.951677  | -1.209982 |
| O | 5.591123  | 2.235034  | 0.048493  | H | -5.172330 | 4.199974  | -2.098879 |
| H | -0.264388 | -0.896453 | -1.002875 | H | -5.532992 | 5.167465  | -0.642839 |

**Table S13.** Atomic coordinates (Å) of 8'S-1-3 obtained at the B3LYP/6-31G(d) level of theory in the gas phase.

|   |           |          |           |   |           |           |           |
|---|-----------|----------|-----------|---|-----------|-----------|-----------|
| C | -2.139199 | 0.861357 | -0.001165 | H | -2.454705 | -1.435616 | -1.330222 |
| C | -3.628589 | 1.176933 | 0.068442  | H | 4.228088  | 3.687670  | 0.900409  |

|   |           |           |           |   |           |           |           |
|---|-----------|-----------|-----------|---|-----------|-----------|-----------|
| C | -4.473721 | 0.189341  | -0.730966 | H | 3.305168  | 1.775953  | 2.010067  |
| C | -4.262051 | -1.269584 | -0.262926 | H | 2.128928  | 2.267015  | 0.800133  |
| C | -2.732169 | -1.573997 | -0.276603 | H | 3.708716  | -3.134734 | -1.063964 |
| C | -2.364124 | -3.024767 | 0.070810  | H | 0.644046  | 0.175476  | 1.686986  |
| C | -0.915670 | -3.325742 | -0.327470 | H | 0.527480  | 1.062365  | 0.186268  |
| C | 0.085419  | -2.360737 | 0.310962  | H | -2.514330 | -3.225573 | 1.138080  |
| C | -0.350438 | -0.900008 | 0.069990  | H | -3.018186 | -3.720226 | -0.462287 |
| C | -1.818192 | -0.567259 | 0.499219  | H | -0.641556 | -4.355929 | -0.072303 |
| C | 0.718300  | 0.065745  | 0.597357  | H | -0.815349 | -3.229635 | -1.415070 |
| C | 0.388762  | -2.742065 | 1.763528  | H | -1.600020 | 1.608858  | 0.587936  |
| C | -4.983630 | -2.187172 | -1.273261 | H | -1.826074 | 0.962060  | -1.046468 |
| C | -4.945610 | -1.474662 | 1.102349  | H | -3.974630 | 1.236576  | 1.100500  |
| C | -1.998778 | -0.602726 | 2.037273  | H | -5.536207 | 0.450080  | -0.594635 |
| C | -3.684203 | 3.568846  | 0.234335  | H | 6.546724  | -1.041640 | -0.726317 |
| C | -3.974306 | 4.832161  | -0.538353 | H | 4.649120  | 3.763192  | -1.555492 |
| C | 2.111884  | -0.380885 | 0.213085  | H | 3.746429  | 2.247531  | -1.768201 |
| C | 3.220242  | 0.455229  | 0.327534  | H | 2.908064  | 3.706315  | -1.201751 |
| C | 4.506522  | 0.033445  | -0.071865 | H | -2.271334 | -1.591058 | 2.411112  |
| C | 4.686892  | -1.282034 | -0.579658 | H | -1.082412 | -0.301755 | 2.550763  |
| C | 3.583112  | -2.124876 | -0.692545 | H | -2.773397 | 0.090864  | 2.369358  |
| C | 2.323476  | -1.683865 | -0.296287 | H | 0.869369  | -3.724860 | 1.767897  |
| C | 3.126226  | 1.836320  | 0.927338  | H | 1.070905  | -2.032337 | 2.239215  |
| C | 4.152422  | 2.776502  | 0.301502  | H | -0.517939 | -2.802023 | 2.366895  |
| C | 3.846256  | 3.143068  | -1.147332 | H | -4.162541 | 1.221375  | -2.336957 |
| C | 5.668793  | 0.915062  | 0.044416  | H | -4.479737 | -2.193266 | -2.242301 |
| O | -3.879194 | 2.475908  | -0.544195 | H | -5.045441 | -3.213883 | -0.900000 |
| O | 5.888243  | -1.752239 | -0.944679 | H | -6.008940 | -1.834690 | -1.433472 |
| O | -4.132687 | 0.277143  | -2.112715 | H | -6.030667 | -1.363279 | 0.993654  |
| O | 6.825617  | 0.538343  | -0.144800 | H | -4.757684 | -2.485900 | 1.476664  |
| O | 1.313957  | -2.578792 | -0.443106 | H | -4.619472 | -0.772095 | 1.870195  |
| O | -3.325972 | 3.514930  | 1.389568  | H | -4.999614 | 4.813140  | -0.921316 |
| O | 5.484208  | 2.208119  | 0.388702  | H | -3.835433 | 5.696014  | 0.111915  |
| H | -0.342567 | -0.800000 | -1.024576 | H | -3.303922 | 4.904928  | -1.401135 |

| Functional       | Solvent? |          | Basis Set    |          | Type of Data    |          |
|------------------|----------|----------|--------------|----------|-----------------|----------|
| mPW1PW91         | PCM      |          | 6-31+G(d, p) |          | Unscaled Shifts |          |
|                  | Isomer 1 | Isomer 2 | Isomer 3     | Isomer 4 | Isomer 5        | Isomer 6 |
| sDP4+ (H data)   | 97.84%   | 2.16%    | —            | —        | —               | —        |
| sDP4+ (C data)   | 95.86%   | 4.14%    | —            | —        | —               | —        |
| sDP4+ (all data) | 99.90%   | 0.10%    | —            | —        | —               | —        |
| uDP4+ (H data)   | 55.61%   | 44.39%   | —            | —        | —               | —        |
| uDP4+ (C data)   | 81.54%   | 18.46%   | —            | —        | —               | —        |
| uDP4+ (all data) | 84.70%   | 15.30%   | —            | —        | —               | —        |
| DP4+ (H data)    | 98.27%   | 1.73%    | —            | —        | —               | —        |
| DP4+ (C data)    | 99.03%   | 0.97%    | —            | —        | —               | —        |
| DP4+ (all data)  | 99.98%   | 0.02%    | —            | —        | —               | —        |

**Figure S25.** Result of DP4+ analysis (Isomer 1: 8'R-1; Isomer 2: 8'S-1)

**Table S14.** Key transitions, oscillator strengths, and rotatory strengths in the ECD spectrum of conformer 8'R-1-1 at the CAM-B3LYP/6-311G(d) level of theory in MeOH with IEFPCM solvent model.

| Num <sup>a</sup> | Transition <sup>b</sup> | CI-coeff <sup>b</sup> | $\Delta E$ (eV) <sup>d</sup> | $\lambda$ (nm) <sup>e</sup> | $f$ | $R_{vel}$ <sup>g</sup> | $R_{len}$ <sup>h</sup> |
|------------------|-------------------------|-----------------------|------------------------------|-----------------------------|-----|------------------------|------------------------|
|------------------|-------------------------|-----------------------|------------------------------|-----------------------------|-----|------------------------|------------------------|

|    |          |          |        |        |        |          |          |
|----|----------|----------|--------|--------|--------|----------|----------|
| 1  | 127->128 | 0.65522  | 4.4591 | 278.05 | 0.1544 | 10.6858  | 10.727   |
| 2  | 126->128 | 0.62937  | 4.9920 | 248.37 | 0.2755 | -6.5486  | -1.2189  |
| 3  | 121->128 | 0.47124  | 5.5405 | 223.78 | 0.0014 | 0.4656   | 1.0121   |
|    | 122->128 | -0.33622 |        |        |        |          |          |
|    | 123->128 | 0.23653  |        |        |        |          |          |
| 4  | 126->128 | -0.25277 | 5.8865 | 210.63 | 0.3417 | -4.4731  | -5.0703  |
|    | 126->129 | 0.24949  |        |        |        |          |          |
|    | 127->129 | 0.58425  |        |        |        |          |          |
| 5  | 121->130 | 0.2642   | 5.9789 | 207.37 | 0.0013 | 3.9272   | 2.9594   |
|    | 122->130 | 0.5358   |        |        |        |          |          |
|    | 124->130 | 0.29797  |        |        |        |          |          |
| 6  | 126->129 | 0.60759  | 6.2462 | 198.49 | 0.6191 | 24.6553  | 26.0958  |
|    | 127->129 | -0.2805  |        |        |        |          |          |
| 7  | 119->128 | 0.49101  | 6.6305 | 186.99 | 0.0807 | 26.2805  | 26.5288  |
|    | 124->128 | -0.25614 |        |        |        |          |          |
| 8  | 118->128 | -0.27856 | 6.8606 | 180.72 | 0.0903 | -5.9778  | -7.4736  |
|    | 119->128 | 0.4063   |        |        |        |          |          |
|    | 124->128 | 0.30457  |        |        |        |          |          |
| 9  | 117->128 | 0.33348  | 7.0886 | 174.91 | 0.0514 | -14.4246 | -17.3807 |
|    | 118->128 | 0.38297  |        |        |        |          |          |
| 10 | 127->131 | 0.46617  | 7.3252 | 169.26 | 0.0348 | 4.2317   | 2.6419   |
|    | 127->132 | -0.26578 |        |        |        |          |          |
| 11 | 125->128 | 0.36033  | 7.3805 | 167.99 | 0.0103 | -7.3575  | -7.8428  |
|    | 127->131 | 0.26115  |        |        |        |          |          |
| 12 | 111->128 | -0.29309 | 7.4963 | 165.39 | 0.0129 | -5.1525  | -6.2995  |
|    | 112->128 | 0.37037  |        |        |        |          |          |
|    | 124->128 | 0.24672  |        |        |        |          |          |
| 13 | 127->135 | 0.49987  | 7.5426 | 164.38 | 0.0474 | -12.9485 | -12.2432 |
| 14 | 121->129 | -0.3103  | 7.6879 | 161.27 | 0.0072 | -10.3756 | -10.5267 |
|    | 122->129 | 0.27055  |        |        |        |          |          |
|    | 125->128 | 0.32721  |        |        |        |          |          |
| 15 | 109->128 | 0.28593  | 7.7835 | 159.29 | 0.0176 | 5.0758   | 6.2969   |
|    | 121->129 | 0.22383  |        |        |        |          |          |
| 16 | 126->131 | 0.3775   | 7.8459 | 158.02 | 0.0611 | -2.179   | -3.1588  |
|    | 126->135 | -0.22363 |        |        |        |          |          |
| 17 | 125->130 | 0.30279  | 7.8598 | 157.74 | 0.0564 | -41.5001 | -46.5901 |
|    | 127->130 | 0.52087  |        |        |        |          |          |
| 18 | 123->128 | 0.23215  | 7.9305 | 156.34 | 0.0307 | -12.6873 | -24.0451 |
|    | 125->130 | 0.26079  |        |        |        |          |          |
|    | 127->130 | -0.22987 |        |        |        |          |          |
| 19 | 123->129 | 0.26788  | 7.9382 | 156.19 | 0.0137 | -13.4618 | -12.4008 |
| 20 | 123->128 | 0.27913  | 7.9507 | 155.94 | 0.0201 | -23.5515 | -20.0529 |
| 21 | 125->130 | -0.25602 | 7.9663 | 155.64 | 0.0287 | 33.5551  | 38.8517  |
|    | 125->131 | 0.23961  |        |        |        |          |          |
|    | 125->132 | 0.28132  |        |        |        |          |          |
| 22 | 126->135 | -0.24444 | 7.9828 | 155.31 | 0.0646 | -9.0284  | -12.1508 |
|    | 127->133 | 0.34487  |        |        |        |          |          |
|    | 127->136 | -0.2488  |        |        |        |          |          |
| 23 | 126->135 | -0.24872 | 8.0365 | 154.28 | 0.0074 | 12.1407  | 12.1363  |
|    | 127->134 | 0.34359  |        |        |        |          |          |
|    | 127->136 | 0.30522  |        |        |        |          |          |



|    |          |          |        |        |        |         |         |
|----|----------|----------|--------|--------|--------|---------|---------|
|    | 127->138 | -0.27099 |        |        |        |         |         |
| 24 | 108->128 | 0.2403   | 8.0733 | 153.57 | 0.0007 | -7.0817 | -7.4658 |
|    | 115->128 | -0.24733 |        |        |        |         |         |
|    | 120->128 | -0.23162 |        |        |        |         |         |
|    | 124->128 | 0.28908  |        |        |        |         |         |
| 25 | 126->131 | 0.29649  | 8.1106 | 152.87 | 0.0309 | 8.3256  | 9.5104  |
|    | 126->135 | 0.2964   |        |        |        |         |         |
|    | 127->134 | 0.28716  |        |        |        |         |         |
| 26 | 126->134 | 0.24606  | 8.1323 | 152.46 | 0.0178 | 1.9344  | 0.6809  |
|    | 126->144 | 0.29493  |        |        |        |         |         |
| 27 | 115->128 | 0.32107  | 8.2267 | 150.71 | 0.0131 | 7.7951  | 7.238   |
|    | 120->128 | -0.22707 |        |        |        |         |         |
|    | 122->128 | 0.35671  |        |        |        |         |         |
| 28 | 117->129 | 0.25521  | 8.2414 | 150.44 | 0.0686 | 10.2522 | 10.9126 |
|    | 119->129 | 0.47536  |        |        |        |         |         |
| 29 | 123->130 | -0.22921 | 8.3661 | 148.20 | 0.0142 | -5.0986 | -7.438  |
|    | 125->130 | -0.26798 |        |        |        |         |         |
|    | 126->130 | 0.52406  |        |        |        |         |         |
| 30 | 120->128 | 0.4003   | 8.3777 | 147.99 | 0.0006 | -0.7855 | -1.2158 |
|    | 121->128 | 0.37446  |        |        |        |         |         |
|    | 122->128 | 0.34947  |        |        |        |         |         |
| 31 | 116->130 | 0.27751  | 8.3953 | 147.68 | 0.0286 | 24.8654 | 24.1109 |
|    | 123->130 | 0.2563   |        |        |        |         |         |
|    | 125->130 | 0.26294  |        |        |        |         |         |
|    | 126->130 | 0.36533  |        |        |        |         |         |
| 32 | 115->128 | 0.23332  | 8.4099 | 147.43 | 0.0039 | -5.6414 | -7.0042 |
|    | 123->128 | -0.23249 |        |        |        |         |         |
| 33 | 127->137 | 0.31853  | 8.4212 | 147.23 | 0.0014 | 2.4774  | -3.0966 |
|    | 127->144 | -0.23889 |        |        |        |         |         |
| 34 | 120->129 | -0.23979 | 8.4352 | 146.98 | 0.0017 | 10.4919 | 13.8197 |
|    | 121->129 | 0.24176  |        |        |        |         |         |
|    | 124->129 | -0.23054 |        |        |        |         |         |
|    | 125->129 | 0.2886   |        |        |        |         |         |
| 35 | 127->145 | 0.43316  | 8.4855 | 146.11 | 0.0009 | -0.1167 | 4.8082  |
|    | 127->147 | 0.2722   |        |        |        |         |         |
| 36 | 117->129 | 0.25795  | 8.5364 | 145.24 | 0.0037 | -4.0944 | -4.811  |
|    | 118->129 | 0.36119  |        |        |        |         |         |
|    | 119->129 | -0.30424 |        |        |        |         |         |

<sup>a</sup>Number of the excited states; <sup>b</sup>Only transitions with contribution over 10.0% were listed; <sup>c</sup>Configuration-interaction coefficient; <sup>d</sup>Excitation energy; <sup>e</sup>Wavelength; <sup>f</sup>Oscillator strength; <sup>g</sup>Rotatory strength in velocity form ( $10^{-40}$  cgs); <sup>h</sup>Rotatory strength in length form ( $10^{-40}$  cgs).

**Table S15.** Key transitions, oscillator strengths, and rotatory strengths in the ECD spectrum of conformer 8'R-1-2 at the CAM-B3LYP/6-311G(d) level of theory in MeOH with IEFPCM solvent model.

| Num <sup>a</sup> | Transition <sup>b</sup> | CI-coeff <sup>b</sup> | $\Delta E$ (eV) <sup>d</sup> | $\lambda$ (nm) <sup>e</sup> | $f$ <sup>f</sup> | $R_{vel}$ <sup>g</sup> | $R_{len}$ <sup>h</sup> |
|------------------|-------------------------|-----------------------|------------------------------|-----------------------------|------------------|------------------------|------------------------|
| 1                | 127->128                | 0.65496               | 4.4538                       | 278.38                      | 0.1520           | -6.8767                | -7.7353                |
| 2                | 126->128                | 0.63263               | 4.9821                       | 248.86                      | 0.2725           | 41.6409                | 43.3858                |
| 3                | 121->128                | 0.41794               | 5.5251                       | 224.40                      | 0.0008           | 0.8704                 | 1.1353                 |
|                  | 122->128                | -0.2973               |                              |                             |                  |                        |                        |
|                  | 123->128                | 0.36122               |                              |                             |                  |                        |                        |
| 4                | 126->128                | -0.24669              | 5.8849                       | 210.68                      | 0.3245           | -11.5776               | -12.6648               |

|    |          |          |        |        |        |          |          |
|----|----------|----------|--------|--------|--------|----------|----------|
|    | 126->129 | 0.25249  |        |        |        |          |          |
|    | 127->129 | 0.58606  |        |        |        |          |          |
| 5  | 121->130 | 0.29467  | 5.9802 | 207.32 | 0.0012 | 4.0549   | 3.0419   |
|    | 122->130 | 0.54069  |        |        |        |          |          |
|    | 124->130 | 0.30354  |        |        |        |          |          |
| 6  | 126->129 | 0.60573  | 6.2328 | 198.92 | 0.6145 | 35.5886  | 40.0281  |
|    | 127->129 | -0.28589 |        |        |        |          |          |
| 7  | 119->128 | 0.49822  | 6.6779 | 185.66 | 0.0895 | 19.1462  | 18.7657  |
|    | 124->128 | -0.23276 |        |        |        |          |          |
| 8  | 114->128 | -0.27102 | 6.8597 | 180.74 | 0.0607 | -5.6241  | -7.0901  |
|    | 119->128 | 0.27119  |        |        |        |          |          |
|    | 124->128 | 0.30246  |        |        |        |          |          |
| 9  | 118->128 | 0.56798  | 7.1157 | 174.24 | 0.0626 | -21.1222 | -12.2796 |
| 10 | 127->131 | 0.58995  | 7.3196 | 169.39 | 0.0044 | 11.2417  | 11.2861  |
|    | 127->132 | 0.28487  |        |        |        |          |          |
| 11 | 125->128 | 0.39853  | 7.3390 | 168.94 | 0.0122 | -8.8976  | -8.7537  |
| 12 | 112->128 | -0.33314 | 7.4078 | 167.37 | 0.0090 | 3.9447   | 3.4552   |
|    | 114->128 | 0.28463  |        |        |        |          |          |
|    | 124->128 | 0.33517  |        |        |        |          |          |
| 13 | 127->135 | 0.53972  | 7.4928 | 165.47 | 0.0810 | -9.4158  | -8.6362  |
| 14 | 121->129 | -0.27496 | 7.6836 | 161.36 | 0.0016 | -2.3591  | -2.3882  |
|    | 122->129 | 0.24111  |        |        |        |          |          |
|    | 123->129 | -0.25911 |        |        |        |          |          |
|    | 125->128 | 0.34609  |        |        |        |          |          |
| 15 | 109->128 | 0.28228  | 7.7681 | 159.61 | 0.0008 | 4.9032   | 3.3897   |
| 16 | 125->130 | 0.26313  | 7.8472 | 158.00 | 0.0225 | 5.0076   | 1.3383   |
|    | 127->130 | 0.5951   |        |        |        |          |          |
| 17 | 126->131 | 0.40056  | 7.8612 | 157.72 | 0.0159 | -16.6516 | -15.9748 |
|    | 127->132 | -0.25283 |        |        |        |          |          |
|    | 127->134 | -0.27071 |        |        |        |          |          |
| 18 | 126->131 | -0.22845 | 7.9166 | 156.61 | 0.1272 | 68.3254  | 69.6692  |
|    | 126->135 | 0.3461   |        |        |        |          |          |
| 19 | 125->130 | 0.29214  | 7.9315 | 156.32 | 0.0484 | -81.2623 | -85.2659 |
|    | 126->135 | 0.22678  |        |        |        |          |          |
| 20 | 123->128 | 0.23719  | 7.9361 | 156.23 | 0.0421 | -27.1744 | -32.926  |
|    | 125->130 | 0.2608   |        |        |        |          |          |
| 21 | 126->131 | 0.32276  | 7.9527 | 155.90 | 0.0410 | -26.5652 | -26.7939 |
| 22 | 125->132 | 0.2988   | 7.9644 | 155.67 | 0.0121 | 21.3211  | 24.5316  |
| 23 | 123->128 | 0.24008  | 7.9763 | 155.44 | 0.0253 | 1.0236   | 3.0597   |
|    | 126->135 | 0.29488  |        |        |        |          |          |
| 24 | 108->128 | 0.24519  | 8.0788 | 153.47 | 0.0011 | -4.4311  | -5.9638  |
|    | 115->128 | -0.23367 |        |        |        |          |          |
|    | 124->128 | 0.29169  |        |        |        |          |          |
| 25 | 126->144 | -0.24473 | 8.1091 | 152.90 | 0.0035 | -5.6561  | -5.3496  |
|    | 127->133 | 0.27532  |        |        |        |          |          |
|    | 127->136 | -0.25012 |        |        |        |          |          |
|    | 127->138 | -0.2477  |        |        |        |          |          |
| 26 | 126->144 | 0.23958  | 8.1503 | 152.12 | 0.0188 | 6.1992   | 4.8957   |
| 27 | 119->129 | 0.29781  | 8.2234 | 150.77 | 0.0599 | 7.4504   | 9.0092   |
|    | 122->128 | -0.23788 |        |        |        |          |          |
| 28 | 115->128 | 0.2283   | 8.2456 | 150.36 | 0.0150 | -11.6791 | -12.4143 |

|    |          |          |        |        |        |          |          |
|----|----------|----------|--------|--------|--------|----------|----------|
|    | 119->129 | 0.24809  |        |        |        |          |          |
|    | 122->128 | 0.2656   |        |        |        |          |          |
| 29 | 126->130 | 0.60733  | 8.3387 | 148.69 | 0.0007 | -2.4409  | -2.0831  |
| 30 | 127->137 | 0.2894   | 8.3566 | 148.37 | 0.0020 | -0.1342  | 0.3439   |
| 31 | 120->128 | 0.39496  | 8.3823 | 147.91 | 0.0010 | -2.9283  | -3.3651  |
|    | 121->128 | -0.38553 |        |        |        |          |          |
|    | 122->128 | -0.34298 |        |        |        |          |          |
| 32 | 116->130 | 0.30631  | 8.3917 | 147.75 | 0.0386 | 49.0154  | 36.7     |
|    | 123->130 | 0.28596  |        |        |        |          |          |
|    | 125->130 | 0.32584  |        |        |        |          |          |
| 33 | 127->141 | -0.25231 | 8.4020 | 147.56 | 0.0020 | -23.9826 | -15.8011 |
|    | 127->143 | 0.22493  |        |        |        |          |          |
|    | 127->145 | 0.26577  |        |        |        |          |          |
|    | 127->146 | 0.35144  |        |        |        |          |          |
| 34 | 115->128 | 0.2926   | 8.4354 | 146.98 | 0.0031 | -10.6424 | -9.8788  |
|    | 117->128 | -0.22476 |        |        |        |          |          |
|    | 122->128 | -0.22466 |        |        |        |          |          |
| 35 | 126->132 | 0.2311   | 8.4466 | 146.79 | 0.0111 | 12.3078  | 12.9916  |
|    | 126->134 | 0.23143  |        |        |        |          |          |
| 36 | 124->129 | -0.22815 | 8.4608 | 146.54 | 0.0081 | 14.2638  | 13.5725  |
|    | 125->129 | 0.28794  |        |        |        |          |          |

<sup>a</sup>Number of the excited states; <sup>b</sup>Only transitions with contribution over 10.0% were listed; <sup>c</sup>Configuration-interaction coefficient; <sup>d</sup>Excitation energy; <sup>e</sup>Wavelength; <sup>f</sup>Oscillator strength; <sup>g</sup>Rotatory strength in velocity form (10<sup>-40</sup> cgs); <sup>h</sup>Rotatory strength in length form (10<sup>-40</sup> cgs).

**Table S16.** Key transitions, oscillator strengths, and rotatory strengths in the ECD spectrum of conformer 8'R-1-3 at the CAM-B3LYP/6-311G(d) level of theory in MeOH with IEFPCM solvent model.

| <i>Num<sup>a</sup></i> | <i>Transition<sup>b</sup></i> | <i>CI-coeff<sup>b</sup></i> | <i>ΔE (eV)<sup>d</sup></i> | <i>λ (nm)<sup>e</sup></i> | <i>f<sup>f</sup></i> | <i>R<sub>ve</sub><sup>g</sup></i> | <i>R<sub>len</sub><sup>h</sup></i> |
|------------------------|-------------------------------|-----------------------------|----------------------------|---------------------------|----------------------|-----------------------------------|------------------------------------|
| 1                      | 127->128                      | 0.65529                     | 4.4593                     | 278.04                    | 0.1554               | 11.2889                           | 11.2721                            |
| 2                      | 126->128                      | 0.62936                     | 4.9925                     | 248.34                    | 0.2769               | -6.2949                           | -0.8608                            |
|                        | 127->129                      | 0.22072                     |                            |                           |                      |                                   |                                    |
| 3                      | 121->128                      | 0.47868                     | 5.5407                     | 223.77                    | 0.0014               | 0.5692                            | 1.0779                             |
|                        | 123->128                      | 0.37119                     |                            |                           |                      |                                   |                                    |
| 4                      | 126->128                      | -0.25295                    | 5.8867                     | 210.62                    | 0.3432               | -6.562                            | -7.0042                            |
|                        | 126->129                      | 0.24967                     |                            |                           |                      |                                   |                                    |
|                        | 127->129                      | 0.58401                     |                            |                           |                      |                                   |                                    |
| 5                      | 122->130                      | 0.58839                     | 5.9700                     | 207.68                    | 0.0013               | -3.3054                           | -3.3899                            |
|                        | 125->130                      | 0.20315                     |                            |                           |                      |                                   |                                    |
| 6                      | 126->129                      | 0.60742                     | 6.2465                     | 198.49                    | 0.6247               | 28.67                             | 30.274                             |
|                        | 127->129                      | -0.28062                    |                            |                           |                      |                                   |                                    |
| 7                      | 119->128                      | 0.45951                     | 6.6324                     | 186.94                    | 0.0840               | 26.9978                           | 27.2694                            |
|                        | 120->128                      | 0.23517                     |                            |                           |                      |                                   |                                    |
|                        | 124->128                      | -0.24885                    |                            |                           |                      |                                   |                                    |
| 8                      | 118->128                      | -0.23939                    | 6.8632                     | 180.65                    | 0.0892               | -6.3924                           | -8.0035                            |
|                        | 119->128                      | 0.4339                      |                            |                           |                      |                                   |                                    |
|                        | 124->128                      | 0.29846                     |                            |                           |                      |                                   |                                    |
| 9                      | 112->128                      | -0.19727                    | 7.0901                     | 174.87                    | 0.0519               | -12.7443                          | -15.524                            |
|                        | 117->128                      | 0.31633                     |                            |                           |                      |                                   |                                    |
|                        | 118->128                      | 0.40133                     |                            |                           |                      |                                   |                                    |
| 10                     | 127->131                      | 0.47134                     | 7.3237                     | 169.29                    | 0.0360               | 2.8509                            | 1.3364                             |
|                        | 127->132                      | -0.26418                    |                            |                           |                      |                                   |                                    |

|    |          |          |        |        |        |          |          |
|----|----------|----------|--------|--------|--------|----------|----------|
| 11 | 124->128 | -0.25583 | 7.3814 | 167.97 | 0.0095 | -6.7583  | -7.3878  |
|    | 125->128 | 0.35577  |        |        |        |          |          |
|    | 127->131 | 0.23935  |        |        |        |          |          |
| 12 | 112->128 | 0.40608  | 7.5013 | 165.28 | 0.0121 | -5.0463  | -6.1503  |
|    | 118->128 | 0.19876  |        |        |        |          |          |
|    | 124->128 | 0.24618  |        |        |        |          |          |
| 13 | 127->131 | 0.22667  | 7.5438 | 164.35 | 0.0488 | -10.3223 | -9.3201  |
|    | 127->134 | 0.24371  |        |        |        |          |          |
|    | 127->135 | 0.49731  |        |        |        |          |          |
| 14 | 125->130 | 0.52612  | 7.6328 | 162.44 | 0.0380 | 20.6458  | 26.1641  |
|    | 125->132 | -0.21877 |        |        |        |          |          |
| 15 | 108->128 | -0.2266  | 7.6739 | 161.57 | 0.0067 | -10.1029 | -10.1359 |
|    | 109->128 | 0.20963  |        |        |        |          |          |
|    | 121->129 | -0.30585 |        |        |        |          |          |
|    | 123->129 | -0.24162 |        |        |        |          |          |
|    | 125->128 | 0.3865   |        |        |        |          |          |
| 16 | 109->128 | 0.25979  | 7.7772 | 159.42 | 0.0139 | 2.9338   | 3.7583   |
|    | 121->129 | 0.34421  |        |        |        |          |          |
|    | 124->129 | 0.24081  |        |        |        |          |          |
|    | 125->128 | 0.19609  |        |        |        |          |          |
| 17 | 126->131 | 0.36659  | 7.8370 | 158.20 | 0.0747 | -2.8208  | -3.8702  |
|    | 126->132 | -0.21324 |        |        |        |          |          |
|    | 126->134 | -0.2101  |        |        |        |          |          |
|    | 126->135 | -0.24508 |        |        |        |          |          |
| 18 | 108->128 | 0.20615  | 7.9165 | 156.61 | 0.0052 | -14.4139 | -11.9953 |
|    | 123->128 | 0.28011  |        |        |        |          |          |
|    | 125->128 | 0.20213  |        |        |        |          |          |
|    | 127->130 | -0.27838 |        |        |        |          |          |
|    | 127->133 | 0.19523  |        |        |        |          |          |
| 19 | 123->128 | 0.18777  | 7.9422 | 156.11 | 0.0334 | -36.006  | -37.8589 |
|    | 127->130 | 0.48147  |        |        |        |          |          |
| 20 | 120->129 | 0.22246  | 7.9496 | 155.96 | 0.0623 | -15.5794 | -15.2179 |
|    | 123->129 | 0.35042  |        |        |        |          |          |
|    | 124->129 | -0.25337 |        |        |        |          |          |
| 21 | 125->130 | 0.21728  | 7.9792 | 155.38 | 0.0174 | 7.7215   | -0.6379  |
|    | 125->131 | 0.25375  |        |        |        |          |          |
|    | 125->132 | 0.31174  |        |        |        |          |          |
| 22 | 127->130 | 0.31704  | 7.9957 | 155.06 | 0.0612 | -11.9529 | -13.0982 |
|    | 127->133 | 0.33729  |        |        |        |          |          |
|    | 127->136 | 0.32604  |        |        |        |          |          |
| 23 | 126->135 | -0.30454 | 8.0445 | 154.12 | 0.0186 | 15.768   | 15.7963  |
|    | 127->130 | -0.1956  |        |        |        |          |          |
|    | 127->134 | 0.31016  |        |        |        |          |          |
|    | 127->136 | 0.24598  |        |        |        |          |          |
|    | 127->138 | -0.22717 |        |        |        |          |          |
| 24 | 108->128 | -0.28058 | 8.0896 | 153.26 | 0.0012 | -10.6221 | -11.1682 |
|    | 116->128 | 0.38011  |        |        |        |          |          |
|    | 120->128 | -0.21984 |        |        |        |          |          |
|    | 124->128 | -0.22508 |        |        |        |          |          |
| 25 | 126->131 | 0.2646   | 8.1152 | 152.78 | 0.0212 | 6.2243   | 7.5244   |
|    | 126->135 | 0.23679  |        |        |        |          |          |

|    |          |          |        |        |        |          |          |
|----|----------|----------|--------|--------|--------|----------|----------|
|    | 126->144 | -0.18941 |        |        |        |          |          |
|    | 127->134 | 0.30069  |        |        |        |          |          |
| 26 | 126->131 | 0.22794  | 8.1359 | 152.39 | 0.0205 | 7.3157   | 5.9198   |
|    | 126->133 | -0.25449 |        |        |        |          |          |
|    | 126->134 | 0.25975  |        |        |        |          |          |
|    | 126->144 | 0.26083  |        |        |        |          |          |
|    | 126->145 | -0.1978  |        |        |        |          |          |
| 27 | 117->129 | 0.24142  | 8.2406 | 150.46 | 0.0798 | 26.293   | 27.3569  |
|    | 118->129 | 0.21597  |        |        |        |          |          |
|    | 119->129 | 0.47635  |        |        |        |          |          |
| 28 | 115->128 | 0.22709  | 8.2566 | 150.16 | 0.0015 | -3.1968  | -3.6484  |
|    | 120->128 | 0.37481  |        |        |        |          |          |
|    | 122->128 | -0.32907 |        |        |        |          |          |
|    | 124->128 | 0.19736  |        |        |        |          |          |
| 29 | 115->128 | 0.25673  | 8.3697 | 148.13 | 0.0011 | 0.0349   | 0.5127   |
|    | 122->128 | 0.44821  |        |        |        |          |          |
|    | 123->128 | -0.24267 |        |        |        |          |          |
| 30 | 126->130 | 0.56667  | 8.3951 | 147.69 | 0.0039 | 0.822    | 0.4862   |
| 31 | 126->130 | 0.20459  | 8.4175 | 147.29 | 0.0011 | 1.0707   | -5.6525  |
|    | 127->137 | 0.35444  |        |        |        |          |          |
|    | 127->140 | -0.19654 |        |        |        |          |          |
|    | 127->144 | -0.23478 |        |        |        |          |          |
| 32 | 120->130 | -0.19345 | 8.4344 | 147.00 | 0.0132 | 39.6955  | 45.6133  |
|    | 124->129 | 0.19715  |        |        |        |          |          |
|    | 125->129 | -0.18888 |        |        |        |          |          |
| 33 | 120->130 | -0.19376 | 8.4418 | 146.87 | 0.0078 | -22.5728 | -23.9355 |
|    | 126->130 | 0.23645  |        |        |        |          |          |
| 34 | 127->145 | 0.40402  | 8.4839 | 146.14 | 0.0015 | 2.1554   | 6.8735   |
|    | 127->147 | 0.22938  |        |        |        |          |          |
|    | 127->148 | -0.21958 |        |        |        |          |          |
| 35 | 117->129 | 0.23085  | 8.5261 | 145.42 | 0.0035 | -8.3861  | -9.0666  |
|    | 118->129 | 0.31038  |        |        |        |          |          |
|    | 119->129 | -0.28194 |        |        |        |          |          |
|    | 124->129 | -0.19792 |        |        |        |          |          |
| 36 | 122->128 | 0.2054   | 8.5633 | 144.79 | 0.0043 | 7.4281   | 8.1925   |
|    | 126->134 | 0.25419  |        |        |        |          |          |

<sup>a</sup>Number of the excited states; <sup>b</sup>Only transitions with contribution over 10.0% were listed; <sup>c</sup>Configuration-interaction coefficient; <sup>d</sup>Excitation energy; <sup>e</sup>Wavelength; <sup>f</sup>Oscillator strength; <sup>g</sup>Rotatory strength in velocity form ( $10^{-40}$  cgs); <sup>h</sup>Rotatory strength in length form ( $10^{-40}$  cgs).

**Table S17.** Key transitions, oscillator strengths, and rotatory strengths in the ECD spectrum of conformer 8'R-1-4 at the CAM-B3LYP/6-311G(d) level of theory in MeOH with IEFPCM solvent model.

| <i>Num</i> <sup>a</sup> | <i>Transition</i> <sup>b</sup> | <i>CI-coeff</i> <sup>b</sup> | <i>ΔE (eV)</i> <sup>d</sup> | <i>λ (nm)</i> <sup>e</sup> | <i>f</i> <sup>f</sup> | <i>R<sub>vel</sub></i> <sup>g</sup> | <i>R<sub>len</sub></i> <sup>h</sup> |
|-------------------------|--------------------------------|------------------------------|-----------------------------|----------------------------|-----------------------|-------------------------------------|-------------------------------------|
| 1                       | 127->128                       | 0.65495                      | 4.4545                      | 278.34                     | 0.1529                | -6.6824                             | -7.5791                             |
| 2                       | 126->128                       | 0.63262                      | 4.9828                      | 248.82                     | 0.2741                | 42.1056                             | 43.9927                             |
| 3                       | 121->128                       | 0.42118                      | 5.5252                      | 224.40                     | 0.0008                | 0.9367                              | 1.1947                              |
|                         | 123->128                       | 0.44891                      |                             |                            |                       |                                     |                                     |
| 4                       | 126->128                       | -0.24684                     | 5.8848                      | 210.69                     | 0.3259                | -13.0944                            | -14.1663                            |
|                         | 126->129                       | 0.25263                      |                             |                            |                       |                                     |                                     |
|                         | 127->129                       | 0.58579                      |                             |                            |                       |                                     |                                     |
| 5                       | 122->130                       | 0.58725                      | 5.9705                      | 207.66                     | 0.0013                | -3.7726                             | -3.6627                             |

|    |          |          |        |        |        |          |          |
|----|----------|----------|--------|--------|--------|----------|----------|
| 6  | 126->129 | 0.60551  | 6.2326 | 198.93 | 0.6201 | 40.3095  | 44.7751  |
|    | 127->129 | -0.28604 |        |        |        |          |          |
| 7  | 119->128 | 0.48131  | 6.6801 | 185.60 | 0.0927 | 20.0205  | 19.5446  |
|    | 121->128 | -0.24903 |        |        |        |          |          |
| 8  | 113->128 | 0.22765  | 6.8620 | 180.68 | 0.0591 | -5.7551  | -7.3398  |
|    | 119->128 | 0.35105  |        |        |        |          |          |
|    | 124->128 | 0.30618  |        |        |        |          |          |
| 9  | 118->128 | 0.5625   | 7.1173 | 174.20 | 0.0629 | -19.7742 | -10.7755 |
| 10 | 127->131 | 0.5913   | 7.3159 | 169.47 | 0.0043 | 11.8734  | 12.0108  |
|    | 127->132 | -0.29058 |        |        |        |          |          |
| 11 | 125->128 | 0.38795  | 7.3418 | 168.87 | 0.0123 | -9.0927  | -8.9452  |
| 12 | 113->128 | 0.39658  | 7.4146 | 167.22 | 0.0090 | 4.3207   | 3.7791   |
|    | 124->128 | -0.34854 |        |        |        |          |          |
| 13 | 127->135 | 0.5237   | 7.4930 | 165.47 | 0.0831 | -8.3521  | -7.3467  |
| 14 | 125->130 | 0.52589  | 7.6322 | 162.45 | 0.0373 | 20.5422  | 26.2376  |
|    | 125->132 | -0.22578 |        |        |        |          |          |
| 15 | 121->129 | -0.25483 | 7.6683 | 161.68 | 0.0018 | -0.4529  | -0.5616  |
|    | 123->129 | -0.29208 |        |        |        |          |          |
|    | 125->128 | 0.41161  |        |        |        |          |          |
| 16 | 121->129 | 0.2776   | 7.7596 | 159.78 | 0.0006 | 3.6641   | 2.4042   |
|    | 123->129 | 0.2852   |        |        |        |          |          |
| 17 | 126->131 | 0.34332  | 7.8519 | 157.90 | 0.0132 | -10.7047 | -7.5141  |
|    | 127->130 | -0.24576 |        |        |        |          |          |
|    | 127->133 | 0.25451  |        |        |        |          |          |
|    | 127->134 | -0.24876 |        |        |        |          |          |
| 18 | 126->131 | 0.3665   | 7.9135 | 156.67 | 0.0792 | 45.4673  | 46.8842  |
|    | 126->135 | -0.23257 |        |        |        |          |          |
|    | 127->130 | 0.23815  |        |        |        |          |          |
| 19 | 116->128 | 0.22519  | 7.9178 | 156.59 | 0.0057 | 11.4914  | 10.6924  |
|    | 123->128 | 0.31056  |        |        |        |          |          |
|    | 125->128 | 0.24639  |        |        |        |          |          |
| 20 | 126->135 | 0.3315   | 7.9336 | 156.28 | 0.1409 | -60.7098 | -66.0998 |
|    | 127->130 | 0.34991  |        |        |        |          |          |
| 21 | 125->132 | 0.26533  | 7.9694 | 155.58 | 0.0110 | 6.7718   | 3.5049   |
|    | 127->130 | 0.24962  |        |        |        |          |          |
| 22 | 124->129 | -0.24204 | 7.9739 | 155.49 | 0.0237 | -17.362  | -15.4758 |
|    | 126->135 | 0.29205  |        |        |        |          |          |
| 23 | 125->132 | -0.24029 | 7.9940 | 155.10 | 0.0378 | -32.6739 | -36.275  |
|    | 127->130 | 0.40963  |        |        |        |          |          |
| 24 | 108->128 | 0.2546   | 8.0930 | 153.20 | 0.0023 | -11.6038 | -13.39   |
|    | 116->128 | 0.31821  |        |        |        |          |          |
| 25 | 127->133 | 0.266    | 8.1077 | 152.92 | 0.0030 | -0.5492  | -0.7554  |
|    | 127->136 | 0.33212  |        |        |        |          |          |
|    | 127->138 | 0.23211  |        |        |        |          |          |
| 26 | 126->133 | -0.22414 | 8.1511 | 152.11 | 0.0201 | 7.644    | 6.6784   |
|    | 126->136 | -0.24329 |        |        |        |          |          |
|    | 126->144 | 0.25398  |        |        |        |          |          |
| 27 | 118->129 | 0.26239  | 8.2320 | 150.61 | 0.0712 | 0.9052   | 2.9686   |
|    | 119->129 | 0.43087  |        |        |        |          |          |
| 28 | 120->128 | 0.38147  | 8.2658 | 150.00 | 0.0017 | -4.7414  | -5.4261  |
|    | 122->128 | -0.32896 |        |        |        |          |          |

|    |          |          |        |        |        |          |         |
|----|----------|----------|--------|--------|--------|----------|---------|
| 29 | 126->130 | 0.37254  | 8.3352 | 148.75 | 0.0008 | -0.8107  | -0.4561 |
|    | 127->137 | -0.28811 |        |        |        |          |         |
| 30 | 126->130 | 0.41928  | 8.3805 | 147.94 | 0.0038 | 0.5144   | -1.1718 |
|    | 127->137 | 0.25362  |        |        |        |          |         |
| 31 | 115->128 | 0.2261   | 8.3839 | 147.88 | 0.0007 | 1.8153   | 2.2541  |
|    | 122->128 | 0.44332  |        |        |        |          |         |
|    | 126->130 | -0.23369 |        |        |        |          |         |
| 32 | 127->141 | -0.23458 | 8.3981 | 147.63 | 0.0017 | 4.7288   | 6.4209  |
|    | 127->143 | -0.24996 |        |        |        |          |         |
|    | 127->146 | 0.42639  |        |        |        |          |         |
| 33 | 120->130 | 0.30201  | 8.4332 | 147.02 | 0.0285 | 28.6011  | 30.5629 |
|    | 122->130 | -0.25836 |        |        |        |          |         |
|    | 124->130 | 0.23645  |        |        |        |          |         |
|    | 125->130 | 0.25562  |        |        |        |          |         |
| 34 | 121->129 | -0.23673 | 8.4586 | 146.58 | 0.0077 | -11.9981 | -11.519 |
|    | 124->129 | 0.32194  |        |        |        |          |         |
|    | 125->129 | -0.30364 |        |        |        |          |         |
| 35 | 126->130 | 0.31867  | 8.4708 | 146.37 | 0.0033 | 6.6517   | 6.5007  |
|    | 126->134 | -0.24006 |        |        |        |          |         |
| 36 | 118->129 | 0.47383  | 8.5579 | 144.88 | 0.0014 | -7.8999  | -8.5001 |
|    | 119->129 | -0.3287  |        |        |        |          |         |

<sup>a</sup>Number of the excited states; <sup>b</sup>Only transitions with contribution over 10.0% were listed; <sup>c</sup>Configuration-interaction coefficient; <sup>d</sup>Excitation energy; <sup>e</sup>Wavelength; <sup>f</sup>Oscillator strength; <sup>g</sup>Rotatory strength in velocity form ( $10^{-40}$  cgs); <sup>h</sup>Rotatory strength in length form ( $10^{-40}$  cgs).
